## Feasibility of Identifying Factors Related to Alzheimer's Disease and Related Dementia in Real-World Data

Aokun Chen<sup>\*1</sup>, Qian Li<sup>\*1</sup>, Yu Huang<sup>\*1</sup>, Yongqiu Li<sup>1</sup>, Yu-neng Chuang<sup>2</sup>, Xia Hu<sup>2</sup>, Serena Guo<sup>3</sup>, Yonghui Wu<sup>1</sup>, Yi Guo<sup>1</sup>, Jiang Bian<sup>1</sup>

<sup>1</sup> Department of Health Outcomes and Biomedical Informatics, College of Medicine, University of Florida, 1889 Museum Rd, Suite 7000, Gainesville, FL 32610

<sup>2</sup> Department of Computer Science, George R. Brown School of Engineering, Rice University, 6100 Main St., Houston, TX 77005

<sup>3</sup> Department of Pharmaceutical Outcomes & Policy, College of Pharmacy, University of Florida, 1225 Center Drive, Gainesville, FL 32610

\*Co-first, contributed equally

Corresponding authors:

Jiang Bian, PhD [bianjiang@ufl.edu](mailto:bianjiang@ufl.edu)

Affiliation: Department of Health Outcomes & Biomedical Informatics, University of Florida

Address: 1889 Museum Rd #7002, PO Box 100147, Gainesville, FL 32610

Phone Number: (352) 273-8878

## ABSTRACT

A comprehensive understanding of factors associated with Alzheimer’s disease (AD) and AD-related dementias (AD/ADRD) will significantly enhance efforts when designing new studies to develop new treatments and identify high-risk populations for prevention. We reviewed existing meta-analyses and review articles on AD/ADRD risk and preventive factors, extracting 477 risk factors across 10 categories from 537 studies. An interactive knowledge graph was created to share our study findings. Most risk factors can be found in structured Electronic Health Records (EHRs), with clinical narratives also providing valuable information. However, assessing genomic risk factors using real-world data (RWD) like EHRs remains a challenge, as genetic testing for AD/ADRD is still not a common practice and poorly documented in both structured and unstructured EHRs. Given the constant and rapid evolution of AD/ADRD research, using natural language processing (NLP) for literature mining emerges as a viable method to continually and automatically update our knowledge graph.

## Introduction

Alzheimer's disease (AD) and AD-related dementias (AD/ADRD) are progressive neurodegenerative illnesses that cause memory loss and other cognitive impairments. In the United States, there are currently an estimated 6.7 million patients living with AD. This number is expected to double by 2060, reaching 13.8 million [1]. Despite being a national focus through initiatives like the National Alzheimer's Project Act and significant investments, there is still no effective treatment or preventive strategy. The few pharmaceutical treatments available primarily aim to alleviate symptoms, such as improving cognition, behavior, and global function; however, these improvements are modest at best [2]. Recently, new anti-amyloid antibody therapies, such as Aducanumab and Lecanemab, were approved by the U.S. Food and Drug Administration (FDA). These drugs have shown promising efficacy in clinical trials data [3,4], yet concerns about their real-world effectiveness and controversies have arisen [5–7], especially concerns on whether their limited efficacies reported in trials are clinically meaningful but also discussions on how to appropriately use these treatment in real-world clinical settings [8–10].

The complex mechanisms involved in the pathogenesis of AD/ADRD remain unclear. It is speculated that AD/ADRD results from a complicated interplay of brain changes associated with various age, genetic, environmental, and lifestyle factors. Although abundant literature exists on different factors, either as risks or protective elements, related to AD/ADRD from wet lab to population science studies, a comprehensive overview encompassing all these factors is lacking. Previous studies have often focused on subsets of these factors from specific types or categories, such as genetic or environmental influences [11–15]. A comprehensive view of factors associated with AD/ADRD will significantly aid in studies to develop new treatments for AD/ADRD and identify high-risk populations and patients for prevention efforts.

The wide adoption of electronic health records (EHRs) has made large collections of real-world data (RWD) [16,17] and detailed patient information available for research. This includes sociodemographic data, lab tests, medications, disease status, and treatment outcomes, offering unique opportunities to generate real-world evidence (RWE) that reflects the patients' treated in real-world settings. EHRs typically contain structured data, often coded (e.g., diagnoses coded in International Classification of Diseases). However, over 80% of information in EHRs is documented in free-text clinical narratives, such as physicians' notes and radiology reports [18]. These narratives contain detailed patient characteristics including important AD/ADRD risk factors, such as apolipoprotein E (APOE) and social determinants of health (SDoH), that are often not coded in structured EHR data. They also offer more fine-grained outcomes, such as scores from cognitive assessments like the Mini-Mental State Exam (MMSE) and Montreal Cognitive Assessment (MoCA), which help the determine severity of dementia. For example, in a previous study, we have assessed the documentation of cognitive tests and biomarkers for AD/ADRD in

unstructured EHRs and developed natural language processing (NLP) pipelines to extract them into discrete values for downstream studies.

In our study, we summarized the risk factors for AD/ADRD by reviewing existing meta-analyses and review articles on risk and preventive factors for AD/ADRD. Compared with the previous studies [19–24], our work provides a updated review of recent publications on AD/ADRD-related risk factors. Drawing from this literature review and identified AD/ADRD factors, we explored the accessibility of these risk and preventive factors in both structured and unstructured EHR data. To disseminate our study results, we also constructed an interactive knowledge map that can be used to aid in the design of future AD/ADRD studies that aim to leverage large collections of RWD to generate RWE.

## Methods

Our study consisted of four steps: literature screening, full-text extraction, knowledge graph generation, and accessibility assessment, as depicted in **Figure 1**. We first searched and screened titles and abstracts from relevant literature databases using a predefined set of keywords. We then performed full text extraction on the selected literature on risk factors for AD/ADRD. With the extracted AD/ADRD risk factors, we constructed a knowledge graph and visualized these factors and their interrelationships. Finally, we examined the accessibility of these AD/ADRD risk factors based on a RWD dataset from the University of Florida Health (UF Health) Integrated Data Repository (IDR), with a specific focus on those factors not readily available in structured EHRs, but in unstructured clinical narratives.

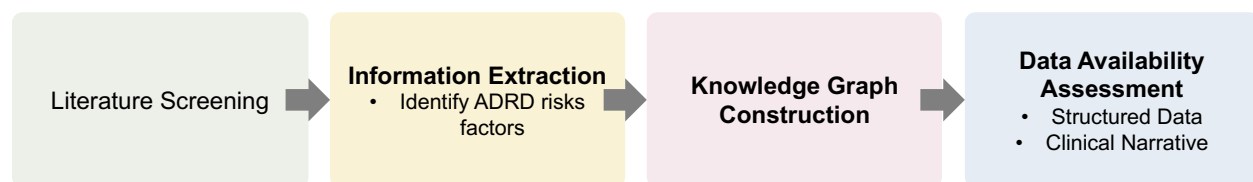

**Figure 1.** The overall workflow of the study.

### Literature search strategy and screening

Our literature review process adhered to the Preferred Reporting Items for Systematic Reviews and Meta-Analyses (PRISMA) guidelines. To thoroughly identify known risk or protective factors related to AD/ADRD, we conducted searches in three electronic bibliographic databases—PubMed, Cochrane, and Embase—focusing on reviews, systematic reviews, and meta-analysis articles published in the most recent decade. We included two sets of keywords: (1) those related

to AD/ADRD (e.g., “Alzheimer’s disease,” “Alzheimer’s and related dementias,” “ADRD,” “Lewy body,” “vascular dementia,” “frontotemporal dementia,” and “dementias”) and (2) those related to risk or protective factors (e.g., “risk factor,” and “prevention”). We excluded case reports, non-human studies, studies of factors not directly associated with dementia, and non-English literature from the search results. We conducted two rounds of screening: title/abstract screening and full-text screening. In each round, at least two reviewers independently reviewed the materials, with any conflicts resolved by a third reviewer.

### Full-text risk factor extraction

We developed an information extraction form to document the risk factors and their relationships with the outcomes of interest reported in each article. The relationship should include three components: the factor, the outcome, and the effect, formulating a triple statement in the format of a subject-predicate-object expression. For example, one article reported, “A meta-analysis of studies in normal individuals detected that higher adherence to the MedDiet was associated with lower risk for Alzheimer’s disease (AD) (HR = 0.64; 95 % CI:0.46, 0.89)” [25]. Here, the factor is “higher adherence to the MedDiet”, the outcome is “risk for Alzheimer’s disease”, the effect is “decreased risk significantly,” and the triple is “higher adherence to the MedDiet”- “decreased (significantly)” - “risk for Alzheimer’s disease.” After extraction, we developed standardized categories for each component to summarize the factors, outcomes, and the effects of the factors on the outcomes (**Table 1**).

**Table 1.** Standardized categories for the risk factors, outcomes, and the effects of the factors on the outcomes.

| Outcome                                                                                                                                                                                                                                     | Factor Category                                                                                                                                                                                                                                                                 | Effect                                                                                                                                                                                                                    |
|---------------------------------------------------------------------------------------------------------------------------------------------------------------------------------------------------------------------------------------------|---------------------------------------------------------------------------------------------------------------------------------------------------------------------------------------------------------------------------------------------------------------------------------|---------------------------------------------------------------------------------------------------------------------------------------------------------------------------------------------------------------------------|
| <ul style="list-style-type: none"> <li>• Risk of all-cause dementia</li> <li>• Risk of Alzheimer’s Disease</li> <li>• Risk of Vascular Dementia</li> <li>• Risk of Frontotemporal Dementia</li> <li>• Risk of Lewy Body Dementia</li> </ul> | <ul style="list-style-type: none"> <li>• Genomic</li> <li>• Condition</li> <li>• Lifestyle</li> <li>• Biomarker</li> <li>• Medication</li> <li>• Procedure</li> <li>• Family history</li> <li>• Environment</li> <li>• Social economic status</li> <li>• Demographic</li> </ul> | <ul style="list-style-type: none"> <li>• Increase risk significantly</li> <li>• Decrease risk significantly</li> <li>• Not significant (not enough evidence / no association)</li> <li>• Inconsistent evidence</li> </ul> |

### Knowledge graph construction

With the triples extracted from literature, we created a knowledge graph on ADRD risk factors using Neo4j. This knowledge map encompasses the risk factors, associated outcomes, source literature, categories, and their effects on AD/ADRD risk. We have made this knowledge graph

available in an open-access domain to facilitate the exploration of our review results by other researchers.

### Assessment of data availability in electronic health records (EHRs)

We evaluated the data availability of the extracted AD/ADRD-related factors based on the EHRs of an AD/ADRD patient cohort retrieved from the University of Florida (UF) Health Integrated Data Repository (IDR). UF IDR is a clinical data warehouse of UF Health clinical and research enterprises. It consolidates information from various clinical and administrative information systems, including the Epic EHR system, into the IDR data warehouse. The IDR contains more than 2 billion observational facts pertaining to more than 2 million patients. Our assessment consisted of two parts, reflecting the nature of EHR data, (1) structured and coded EHRs, and (2) unstructured clinical narratives such as physicians' progress notes and various reports.

For structured EHR data, we considered two layers of availability: (1) whether the data model can capture the information, and (2) whether the information is actually present in the data. We considered two widely used Common Data Models (CDMs): the National Patient-Centered Clinical Research Network (PCORnet) CDM, and the Observational Medical Outcomes Partnership (OMOP) CDM, as UF Health is part of the OneFlorida+ Clinical Research Consortium contributing to the national PCORnet [26]. According to the two CDMs, we determine that the data model can capture the factors if the data fields are directly available (e.g., age, gender) or if the factors could be queried using standardized codes (e.g., International Classification of Diseases [ICD] codes for conditions and diseases). For each factor that can be formalized into a medical coding system (e.g., ICD codes, Current Procedural Terminology [CPT] codes, Healthcare Common Procedure Coding System [HCPCS] codes, Logical Observation Identifiers Names and Codes [LOINC], RxNorm codes, or National Drug Code [NDC]), we map the factors to the coding system in the data following PCORnet and OMOP CDMs. When then query UF Health IDR to determine whether the risk factors are actually being documented in EHRs.

Some risk factors, such as cognitive tests like MMSE and MoCA, may only be documented in clinical narratives. To assess the availability of each risk factor in unstructured EHR data, we first developed a set of keywords considering various variations, including known abbreviations and synonyms, of how the risk factors would be documented in clinical notes, using a snowballing approach. Using a set of seed keywords (e.g., "MMSE," "Mini-Mental State Exam", etc), we searched the keyword patterns in the clinical narratives, reviewed a random sample (n=20) of the hits, and determined whether each sample contain the information about the risk factor of interest. We calculated the precision (i.e., number of notes that does contain the risk factor over the total number of sampled notes) and eliminated keyword patterns that have high false positive rates.

During this process, we also added new keyword patterns (e.g., a new synonym that we did not capture). We iterated these steps until we did not find any new keyword patterns for each factor.

## Results

A total of 1,308 studies from the last decade were identified from the literature databases. After de-duplication, 1,094 studies remained. **Figure 2.** shows our review procedure in a PRISMA flow diagram. The search yielded 537 distinct studies focused on identifying ADRD-related risk factors.

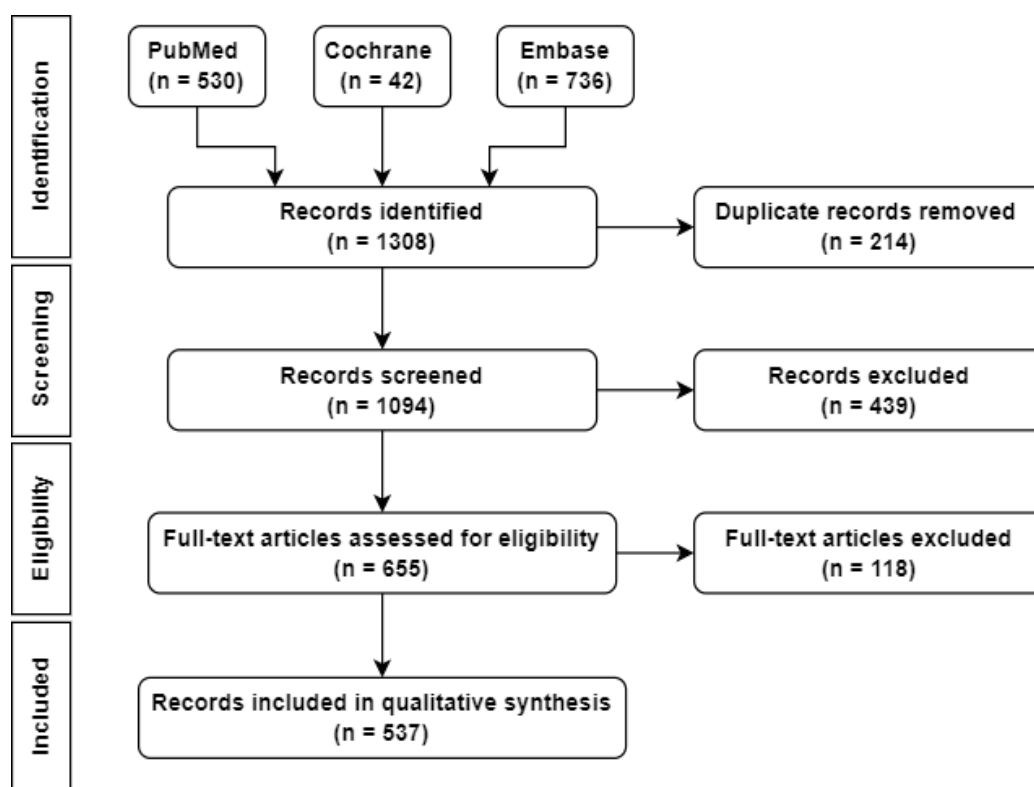

**Figure 2.** Our overall literature search and review procedure according to the Preferred Reporting Items for Systematic Reviews and Meta-Analyses (PRISMA) flow diagram.

### AD/ADRD risk factors in RWD literature

In total, we extracted 477 risk factors in 10 categories from the identified studies. Detailed statistics on these risk factors is shown in **Table 2.**

**Table 2.** Summary statistics of AD/ADRD risk factors extracted from literature.

| Risk factor category | Number of unique risk factors | Number of unique articles |
|----------------------|-------------------------------|---------------------------|
| Genomic              | 88                            | 55                        |
| Disease/Condition    | 172                           | 88                        |
| Lifestyle            | 73                            | 42                        |
| Biomarker            | 40                            | 24                        |
| Medication           | 71                            | 48                        |
| Procedure            | 2                             | 4                         |
| Family history       | 1                             | 1                         |
| Environment          | 6                             | 5                         |
| Socioeconomic status | 16                            | 13                        |
| Demographic          | 8                             | 10                        |

Genomic-related risk factors reported in the literature for AD/ADRD typically involve gene mutations and alleles that could affect the incidence and outcome of the disease. We identified 88 unique genomic-related AD/ADRD risk factors from 55 studies [27–80]. Among these, 81 were reported to be related to the risk of AD, 2 on vascular dementia, and 5 on other types of dementia. Out of these studies, 40 reported genomic risk factors that increased the risk of AD/ADRD [27,28,32–36,39–42,44,46–50,53,54,56,58–65,67,72–81], 17 reported non-significant effect [29,37,38,51,55,60,62,70,71], 4 indicated genomic-related risk factors that lower AD/ADRD risk [57,65,66,68], and 1 reported inconsistent results [31]. The most frequently reported genomic-related risk factors is the apolipoprotein E (APOE) gene’s alleles (i.e., APOE, APOE e2, APOE e2/3, APOE e3, APOE e3/4, APOE e4, APOE e4/4), mentioned in a total of 23 mentions. Among the APOE mutations, APOE e3 was consistently reported to lower the risk, and APOE e4 to increase the risk, across various studies, while the effects for the other APOE alleles were mixed.

Disease or condition risk factors refer to other health issues of AD/ADRD patients. We identified 172 unique risk factors from 88 literature. [34,36,69,82–152] Among these, 61 were related to AD, 14 to vascular dementia, and 97 to other types of dementia. Of the 88 studies, 76 reported various diseases and conditions that increased the risk of AD/ADRD [34,36,69,82–85,87–96,98,100–105,107–117,120,121,123–137,139–144,146–148,151,153–161], 13 reported a non-significant effect [91,95,105,109,110,128,145–147,149,150,152,160], 3 studies indicated that certain conditions to lower the risk [114,146,147], and 9 reported inconsistent results [14,86,97,99,106,118,122,138,158]. The five most frequently analyzed conditions included depression (mentioned in 31 studies), diabetes (i.e., type 1 and type 2 diabetes, in 27 studies), traumatic brain injury (14 studies), hypertension (14 studies), and anxiety (13 studies). In the surveyed literature, depression (with 29 studies reported an increased risk of AD/ADRD vs. 2 inconsistent), diabetes (25 increase vs. 1



inconsistent vs. 1 decrease), hypertension (12 increase vs. 2 inconsistent), and anxiety (9 increase vs. 4 inconsistent) were reported to increase the risk of AD/ADRD. Traumatic brain injury showed mixed outcomes, with 7 studies reporting an increased risk of AD/ADRD, 6 inconsistent, and 1 a decrease.

Lifestyle risk factors for AD/ADRD include factors such as physical activity, diet, and substance use. We identified 73 unique lifestyle-related risk factors from 42 publications [34,36,69,91,95,109,110,114,120,122,123,158,162–190]. Among these, 43 were related to AD, 6 to vascular dementia, and 53 to other types of dementia. Of the 42 studies, 14 reported lifestyle risk factors increased the risk of AD/ADRD [69,109,110,120,123,158,162,164,178,181,183,184,189,190], 24 indicated a decrease in risk [34,36,69,109,110,114,158,162,163,167,168,170,172–180,182,187,190], and 5 reported inconsistent effects [91,95,106,122,188]. The five most frequently mentioned lifestyle risk factors in the literature were physical activity (mentioned in 23 studies), smoking (19 studies), alcohol (11 studies), Mediterranean diet (9 studies), and diet in general (7 studies). Regarding physical activity, there was a general consensus that an increasing in activity (1 inconsistent vs. 15 decrease) decreased the risk of AD/ADRD, while the impact of inactivity was less clear (3 increase vs. 4 inconsistent). Most studies suggested that smoking increased the risk of AD/ADRD (13 increase vs. 4 inconsistent vs. 2 decrease). Moderate alcohol consumption was generally believed to reduce the risk of AD/ADRD (increase vs. inconsistent vs. decrease = 3:2:6). As for diet, a healthy diet, such as Mediterranean diet, was considered to decrease the risk of AD/ADRD (3 inconsistent vs. 13 decrease), while diets high in saturated fat were reported to increase the AD/ADRD risk in one literature.

Biomarkers are objective measures that can be used to indicate a patient's medical state accurately and reproducibly, and can be and often used to assess the risk of the patients [191]. We identified 40 unique biomarkers from 24 studies [110,114,155,192–210]. Among these, 39 were found related to AD, 7 to vascular dementia, and 23 to other types of dementia. Of the 24 studies, 26 biomarkers were found to indicate an increased risk of AD/ADRD [109,110,114,192–200,204–210], 2 were associated with a decreased risk [155,203], and 2 showed inconsistent results [122,196]. The seven most studied biomarkers included tau, cholesterol, homocysteine, bone mineral density, magnesium, white matter hyperintensities, and vitamin D level. Most literature reported an increase in tau levels (4 increase vs. 1 inconsistent), homocysteine levels (4 increase), vitamin D deficiency (3 increase), low bone mineral density (2 increase vs. 1 inconsistent), low magnesium levels (2 increase vs. 1 inconsistent), and white matter hyperintensities (2 increase vs. 1 inconsistent) are associated with an increased risk of AD/ADRD. The impact of cholesterol levels was found to be inconsistent in 4 studies.

Medication-related factors, including dietary supplements, refer to the use of medications that could affect the risk of AD/ADRD. We identified 71 unique medication-related risk factors from 48 publications [34,36,69,109,110,114,158,211–249]. Specifically, 62 factors were associated with AD, 3 with vascular dementia, and 41 with other types of dementia. Among these, 3 medications were found to increase the risk of AD/ADRD [69,158,231,250], 45 medications were associated with decreased risk [34,36,69,109,110,114,158,212,217,218,220–222,225,227–230,232–236,238–240,242,244,245,247], 21 showed insignificant results [109,110,158,213–216,219,223,226,228,232,235,237,241,243,248,249,251], and 2 yielded inconsistent results [211,224,246]. The most frequently mentioned medications were statins, antihypertensive medications, Omega-3 Fatty Acids supplement, vitamin E supplements, hormone therapy, and memantine—an antagonist of the N-Methyl-D-Aspartate (NMDA)-receptor used to slow the neurotoxicity that thought to be involved in AD and other neurodegenerative diseases. Most studies reported statins (9 decrease vs. 5 inconsistent), antihypertensive medications (9 decrease vs. 3 inconsistent), vitamin E (3 decrease vs. 2 inconsistent), and memantine (4 decrease) as reducing AD/ADRD risk. The effect of Omega-3 Fatty Acids (1 decrease vs. 4 inconsistent) and hormone therapy (3 increase vs. 3 inconsistent) on AD/ADRD risk were found to be inconsistent.

Procedures in this context refer to medical procedures or non-pharmaceutical interventions that could potentially affect the risk of AD/ADRD. We identified 2 unique procedure-related risk factors from 4 studies [252–255], where neither cognitive training exercises or anesthesia had a significant effect on AD/ADRD risk.

The risk factor of family history pertains to ancestral health patterns that could affect the risk of AD/ADRD. We identified one specific family history risk factor from our review: a family history of Parkinson's disease [256], however its effect on AD risk was not significant. This also speaks to the fact that family history information is poorly documented in EHRs, leading to limited studies that examined how family history affect AD/ADRD risk.

Environment risk factors refer to aspects of ones' surroundings (e.g., natural and built environments) that could influence the risk of AD/ADRD. We identified 6 unique environmental factors from 5 studies [109,110,257–261]. Among these, 6 factors were reported in at least 1 publication to increase the risk of AD/ADRD [257–260], one factor was found to decrease AD/ADRD risk [261], and another was reported to have an insignificant effect [109,110]. The three most frequently mentioned environmental risk factors were electromagnetic fields, pesticides, and air pollution, and all of them, electromagnetic fields (4 increase), air pollution (3 increase vs. 1 decrease), and pesticide (3 increase vs. 1 insignificant) were reported to increase the risk of AD/ADRD.

Socioeconomic status factors represent the aspects of social and economic standing that influence an individual's AD/ADRD risk. We identified 16 unique socioeconomic status risk factors from 13 studies [37,106,109,110,114,116,117,122,158,262–266]. Of these, 6 were reported to affect the risk of AD, while the rest were associated with dementia in general. The most frequently mentioned socioeconomic factor was education, cited in 13 studies. Most of these studies indicated that a higher level of education is associated with a decreased risk of AD/ADRD (15 decrease vs. 5 inconsistent).

Demographic risk factors pertain to the patients' demographic characteristics that are associated with their AD/ADRD risk. We identified 8 unique demographic risk factors from 10 studies [15,34,36,109,110,122,264,267–269]. Among these, 2 risk factor were related to AD, 1 to frontotemporal dementia, and 5 others were related to the risk of dementia in general. The three most frequently mentioned risk factors are age, sex, and bilingualism. All studies addressing age (increase = 5) reported being elderly increases the risk of AD/ADRD. The effect of sex (3 inconsistent vs. 1 increase) and bilingualism (2 inconsistent) on AD/ADRD risk were found to be inconsistent.

#### **Availability of risk factors in real-world data (RWD)**

In addition to surveying the risk factors for AD/ADRD, we also evaluated their accessibility in RWD, especially EHRs. We emphasized risk factors that are not readily available in structured EHRs, but may exist in unstructured clinical narratives, spanning the 10 categories: genomics, condition or disease, lifestyle, biomarker, medication, procedure, family history, environment, socioeconomic status, and demographics. To assess the accessibility of these risk factors, we extracted both structured EHRs and unstructured clinical notes from AD/ADRD patients covering the period from 2012 to 2020 from UF Health IDR. The demographic information of our AD/ADRD cohort can be found in **Table 3**.

**Table 3.** Demographics of AD/ADRD cohort from University of Florida (UF) Health Integrated Data Repository (IDR).

|           | <b>AD/ADRD patients from UF Health IDR<br/>(N=48,912)</b> |
|-----------|-----------------------------------------------------------|
| Age       |                                                           |
| Mean (SD) | 67.94 (21.08) yrs                                         |
| Sex       |                                                           |
| Male (%)  | 23,062 (47.15%)                                           |

|                  |                 |
|------------------|-----------------|
| Race             |                 |
| White (%)        | 34,252 (70.03%) |
| Black (%)        | 11,120 (22.74%) |
| Other (%)        | 2,693 (5.50%)   |
| Unknown (%)      | 846 (1.73%)     |
| Ethnicity        |                 |
| Hispanic (%)     | 1,851 (3.78%)   |
| Non-Hispanic (%) | 45,462 (92.95%) |
| Unknown (%)      | 1,599 (3.27%)   |

Among structured EHRs, we identified 250 out of 477 (55.9%) risk factors. Breaking this down by category, we found 171 condition or disease factors (99.42% out of the total 172), 23 biomarkers (57.50% out of 40), 47 medications (66.20% out of 71), 1 procedure-related factor (50% out of 2), and 7 demographic factors (87.50% out of 8) within the structured EHR. However, we were unable to identify any risk factors in the categories of genomics, lifestyle, family history, environment, and socioeconomic status.

We further examined the availability of these risk factors within unstructured clinical narratives. As shown in **Table 4**, we identified 41 instances of keywords related to AD/ADRD risk factors within the clinical narratives of our AD/ADRD cohort from the UF Health IDR. The top nine most frequently mentioned risk factors among the AD/ADRD patients in clinical narratives included alcohol (96.64%), smoking (96.62%), education (94.24%), activity (i.e., outdoor activity, indoor activity, lack of activity, etc., 92.56%), occupation (88.35%), diet (87.53%), vitamin (75.23%), exercise (e.g., swim, walk, etc. 74.96%), and environment (60.69%). Broken down by the 10 categories, we identified 5 genomic risk factors (5.68% of the 88 genomic risk factors), 14 lifestyle risk factors (19.18% of 73), 3 biomarkers (7.5% of 40), 10 medications (14.08% of 71), 5 environment risk factors (83.33% of 6), 3 socioeconomic status factors (18.75% of the 16), and 1 demographic factor (18.75% of 8) that are available in unstructured EHRs. The summary statistics of the risk factors mentioned in clinical narratives from the UF Health AD/ADRD cohort are summarized in **Table 4**.

**Table 4.** AD/ADRD risk factors identified in clinical narratives from the UF Health AD/ADRD cohort.

| Risk factor    | Unique # of clinical notes with relevant keywords<br>(N = 17,233,317) | Unique # of patients with relevant keywords<br>(N=48,912) |
|----------------|-----------------------------------------------------------------------|-----------------------------------------------------------|
| <b>Genomic</b> |                                                                       |                                                           |
| APOE           | 8,429 (0.05%)                                                         | 1,174 (2.45%)                                             |
| BIN1           | 2 (< 0.01%)                                                           | 1 (< 0.01%)                                               |

|                             |                    |                 |
|-----------------------------|--------------------|-----------------|
| Gene (non-specific)         | 60,192 (0.35%)     | 6,239 (13.0%)   |
| Polymorphism                | 436 (0.0%)         | 92 (0.19%)      |
| <b>Lifestyle</b>            |                    |                 |
| Activity (non-specific)     | 2,514,341 (14.59%) | 44,414 (92.56%) |
| Agreeableness               | 16 (0.0%)          | 13 (0.03%)      |
| Alcohol                     | 3,064,941 (17.78%) | 46,372 (96.64%) |
| Coffee                      | 103331 (0.6%)      | 16,664 (34.73%) |
| Diet                        | 2,035,016 (11.81%) | 41,999 (87.53%) |
| Exercise (non-specific)     | 841,177 (4.88%)    | 35,970 (74.96%) |
| Extraversion                | 7 (< 0.01%)        | 6 (0.01%)       |
| Fish consumption            | 236,192 (1.37%)    | 16,292 (33.95%) |
| Marital status              | 732,762 (4.25%)    | 28,598 (59.60%) |
| Mastication                 | 47,322 (0.27%)     | 12,253 (25.54%) |
| Neuroticism                 | 4 (< 0.01%)        | 3 (0.01%)       |
| Openness                    | 379 (< 0.01%)      | 189 (0.39%)     |
| Smoking                     | 3,195,170 (18.54%) | 46,360 (96.62%) |
| Yoga                        | 20,399 (0.12%)     | 5,526 (11.52%)  |
| <b>Biomarker</b>            |                    |                 |
| Estrogen                    | 25,593 (0.15%)     | 4,961 (10.34%)  |
| Estrone                     | 34 (< 0.01%)       | 14 (0.03%)      |
| Hormones                    | 13,854 (0.08%)     | 4,730 (9.86%)   |
| <b>Medication</b>           |                    |                 |
| Antioxidant                 | 1,377 (0.01%)      | 189 (0.39%)     |
| Cannabinoids                | 5,334 (0.03%)      | 1,159 (2.42%)   |
| DHA                         | 6,711 (0.04%)      | 516 (1.08%)     |
| Diuretics                   | 81,871 (0.47%)     | 10,213 (21.28%) |
| Folate                      | 294,293 (1.71%)    | 25,180 (52.48%) |
| Lycopene                    | 686 (< 0.01%)      | 127 (0.26%)     |
| Omega                       | 219,127 (1.27%)    | 7,184 (14.97%)  |
| Polyphenols                 | 668 (< 0.01%)      | 123 (0.26%)     |
| Vitamin                     | 2,030,498 (11.78%) | 36,100 (75.23%) |
| Zinc                        | 165,757 (0.96%)    | 8,169 (17.02%)  |
| <b>Environment</b>          |                    |                 |
| Aluminum                    | 257,650 (1.49%)    | 13,160 (27.43%) |
| Electromagnetic             | 563 (< 0.01%)      | 272 (0.57%)     |
| Environment (non-specific)  | 287,097 (1.67%)    | 29,120 (60.69%) |
| Pesticides                  | 1,143 (0.01%)      | 356 (0.74%)     |
| Solvents                    | 449 (< 0.01%)      | 118 (0.25%)     |
| <b>Socioeconomic status</b> |                    |                 |
| Education                   | 2,759,829 (16.01%) | 45,219 (94.24%) |
| Illiteracy                  | 678 (< 0.01%)      | 122 (0.25%)     |
| Occupation                  | 1,246,606 (7.23%)  | 42,394 (88.35%) |
| <b>Demographic</b>          |                    |                 |
| Bilingualism                | 4 (< 0.01%)        | 2 (< 0.01%)     |

### A knowledge graph of AD/ADRD risk factors in RWD

With the risk factors and their relations to outcomes identified from the reviewed studies, we built an interactive knowledge graph using Neo4j—a graph database. This knowledge graph visualizes the risk factors and their related mentions from the literature. The knowledge graph and instructions for setting up the Neo4j can be accessed at [https://github.com/uf-hobi-informatics-lab/ADRD\\_risk\\_factor\\_knowledge\\_map](https://github.com/uf-hobi-informatics-lab/ADRD_risk_factor_knowledge_map).

With the established triple statements among risk factors and AD/ADRD outcomes mined from the literature, the knowledge embedded in the graph is poised to facilitate the design of new studies on AD/ADRD using RWD. Below, we demonstrate an example of using the knowledge graph to identify ADRD-related risk factors, potential outcomes, and the interconnections between different risk factors. This use case illustrates how researchers can gain a global view of existing AD/ADRD risk factors through the knowledge map and tailor the scope of their investigation accordingly.

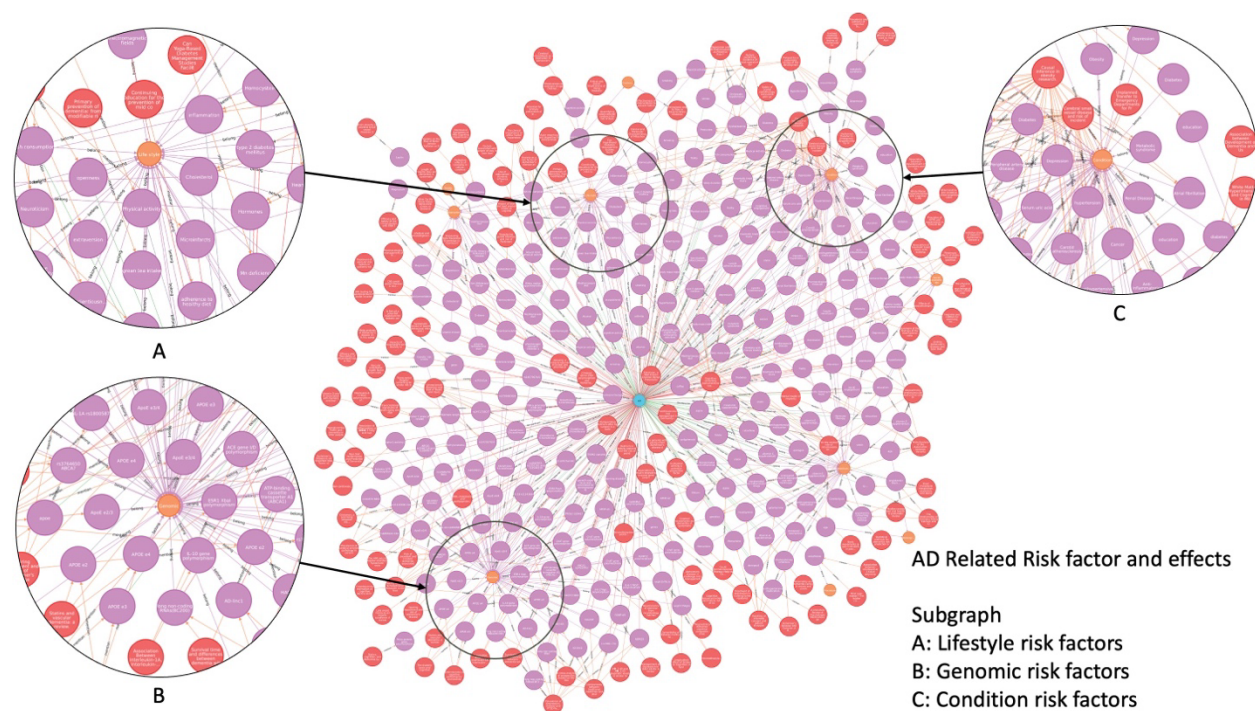

**Figure 3.** An overview of the knowledge graph for AD-related risk factors.

**Figure 3** shows a global view of the knowledge graph with AD-related factors, where the purple dots are the risk factors, while the red dots indicate related mentions identified from the literature.

In total, there are 246 AD-related risk factors from 251 related literature mentions. We can further navigate the knowledge graph to focus on demographic and environmental risk factors related to AD. From **Figure 4-a**, we can see that the risk of AD increases as the age increases reported in two studies: Hersi et al. [270] and Navipour et al. [124]. **Figure 4-b** highlights findings from two studies, Angehrn et al. [257] and Rawat et al. [40], suggesting that environmental exposure to electronic fields may contribute to the development of AD. Additionally, two other studies, Nordestgaard et al. [116] and Gunnarsson et al. [271], concluded that pesticide exposure does not have a significant effect on AD.

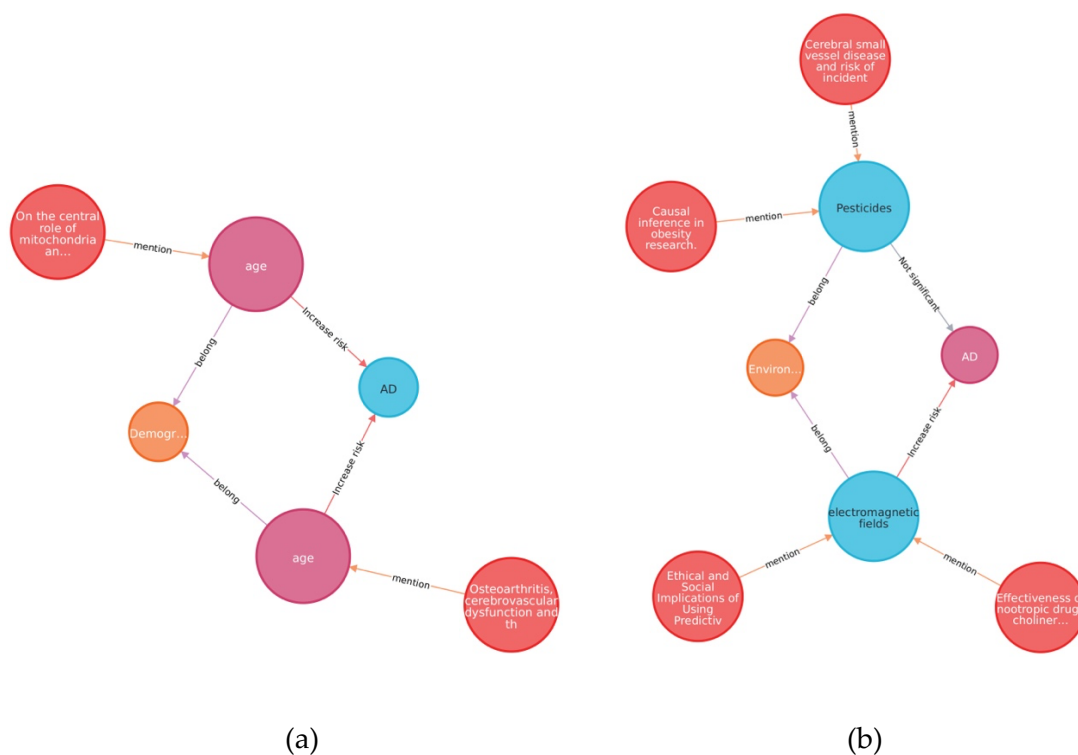

**Figure 4.** Demographic and environmental risk factors for AD: (a) illustrates that age is a risk factor of AD, and (b) illustrates that exposure to pesticide does not have significant effect on AD.

## Discussion

Through a systematic search of literature that focused on AD/ADRD risk factors from the last decade, we extracted 477 risk factors for AD/ADRD in 10 categories, including genomic (n=88), condition or disease (n=172), lifestyle (n=73), biomarker (n=40), medication (n=71), procedure (n=2), family history (n=1), environment (n=6), socioeconomic status (n=16), and demographics (n=8), from 537 studies that met our criteria. We further analyzed the accessibility of these risk factors in both structured and unstructured (i.e., clinical narratives) EHR data using an AD/ADRD cohort from UF Health IDR. We found that 55.9% of the risk factors, primarily

genomic, lifestyle, environment, socioeconomic status factors, were not available in structured EHRs, but do exist in unstructured clinical narratives.

Among the top five mentioned AD/ADRD risk factors, condition or disease-related risk factors were the most frequently studied, with the majority indicating an increased risk of AD/ADRD. Genomic factors ranked second in terms of frequency, with most also reported to elevate AD/ADRD risk. Lifestyle factors were the third most commonly studied category, and these were also predominantly found to increase AD/ADRD risk. Medication factors, the fourth most researched category, were generally found to decrease the risk of AD/ADRD. Biomarker factors, ranking fifth, were mostly reported to associate with an increased risk of AD/ADRD, understandably as these biomarkers are developed to identify or measure AD/ADRD.

Regarding the availability of the top five AD/ADRD risk factors, unsurprisingly a significant portion of condition or disease-related risk factors were accessible from structured EHRs (171 out of 172, 99.42%). This high accessibility likely contributes to their prevalent mention in the literature. In contrast, the availability of genomic risk factors in both structured and unstructured EHR data is limited, despite their frequent mention in the literature; nevertheless, these mentions are mostly focused on the APOE gene—a widely known genetic risk factor for AD. Only 4 genomic risk factors (4.55% out of a total of 88) were only found in clinical narratives of our AD/ADRD cohort from UF Health. The reason is potentially two-fold: (1) genetic testing for AD/ADRD has only become available in the last decade and not yet a routine clinical practice, and (2) genetic tests are often conducted by external labs, with results typically provided in PDF report format rather than being stored discretely in the EHR system. At UF Health, we have only recently implemented the Genomics module in Epic, which is capable of ingesting genetic results from external labs through a standardized interface, thereby making them available in a discrete format. In terms of lifestyle factors, none were retrievable from the structured EHRs. However, from the clinical narratives, we retrieved 14 lifestyle risk factors, accounting for 19.18% out of the total 73, where the most frequently mentioned lifestyle factors include alcohol consumption, smoking, physical activity, and diet. Regarding medication risk factors, 47 (66.20% out of a total of 71) were available from the structured EHRs. These 47 risk factors predominantly involved prescription medicines, making it the second most common category of risk factors sourced from structured EHRs. Additionally, from the clinical narrative, we extracted 10 medication risk factors involving over the counter (OTC) medications, increasing the overall availability of medication risk factors to 80.28%. Among the biomarkers, 23 (57.5% out of a total of 40) were available from structured EHRs. Incorporating the 3 that can be extracted from clinical narratives increased the availability of biomarker risk factor to 65%.



From our observations, we noted a clear trend in the availability of AD/ADRD risk factors within structured EHRs, correlating with their prevalence in literature, except for genomic risk factors. This observation inspires two avenues of future research. First, there is a need for NLP tools to extract AD/ADRD risk factors, especially in the areas of lifestyle, family history, environment, and socioeconomic categories. These AD/ADRD risk factor categories have been under-researched, likely due to limited data availability. Our results indicate that clinical narratives are a promising information source within EHRs. An NLP-based extraction system could greatly enhance data availability in these categories, thereby facilitating research on corresponding risk factors. Second, the integration of other data and information sources with the EHR data is necessary to capture a complete picture of the patient disease development process. For example, genomic factors are the second most researched category, however, they are poorly populated in EHRs. Most current AD/ADRD genomics research data originate from cohorts established by various National Institute on Aging (NIA)-funded consortiums, centers, and repositories [272]. However, these cohorts often lack comprehensive phenotypic information and other critical clinical and socio-environmental factors for modeling AD/ADRD, which are rich in RWD like EHRs. The ability to link and integrate RWD with other data sources, encompassing a broad range of information domains, is critical for future AD/ADRD research. Indeed, the NIA has established the NIA Data LINKAGE Program (LINKAGE) in 2021, aiming to connect NIA-funded study data with other datasets, particularly RWD such as the Medicare claims data from the Centers for Medicare & Medicaid Services (CMS). It also provides a cloud-based Enclave environment to facilitate additional linkages and analyses of these integrated datasets [273].

The knowledge graph needs to be continuously updated, as research on AD/ADRD continues to evolve. However, manually extracting AD/ADRD risk factors from published studies through a systematic scoping review is time-consuming. Literature mining via NLP methods offers an automated way to extract risk factors and relationships from relevant literature, facilitating the discovery of potential connections among AD/ADRD risk factors and outcomes. For example, our previous study [274] demonstrated the effectiveness of employing entity recognition and relation extraction methods to automatically construct a knowledge graph by mining the abstracts of relevant literature. As an illustration, we conducted a search to investigate the relationship between brain trauma and dementia. The results of this search are presented in **Figure 5**. As depicted in the figure, literature reference #632 [275] suggests that traumatic brain injuries, including mild traumatic brain injuries, are likely to contribute to the development of dementia, with trauma potentially acting as a risk factor for AD-related dementia.



Most of the risk factors (including condition, medication, condition, biomarker, and procedure) are accessible from structured EHRs. For those risk factors not accessible from structured EHRs, clinical narratives show promise as information sources, particularly for lifestyle, environmental, and socioeconomic status factors. These narratives also supplement the data on OTC medications and dietary supplements within the category of medication risk factors. However, evaluating genomic risk factors using RWD remains a challenge, as genetic testing for AD/ADRD is still not a common practice as well as being poorly documented in both structured and unstructured EHRs. Our study provides valuable insights and interactive materials to researchers regarding AD/ADRD-related risk factors in RWD and highlights gaps in the field.

## Reference

- [1] (2023) 2023 Alzheimer's disease facts and figures. *Alzheimers Dement*.
- [2] Lanctôt KL, Rajaram RD, Herrmann N (2009) Therapy for Alzheimer's Disease: How Effective are Current Treatments? *Ther Adv Neurol Disord* **2**, 163–180.
- [3] van Dyck CH, Swanson CJ, Aisen P, Bateman RJ, Chen C, Gee M, Kanekiyo M, Li D, Reyderman L, Cohen S, Froelich L, Katayama S, Sabbagh M, Vellas B, Watson D, Dhadda S, Irizarry M, Kramer LD, Iwatsubo T (2023) Lecanemab in early Alzheimer's disease. *N Engl J Med* **388**, 9–21.
- [4] Budd Haeberlein S, Aisen PS, Barkhof F, Chalkias S, Chen T, Cohen S, Dent G, Hansson O, Harrison K, von Hehn C, Iwatsubo T, Mallinckrodt C, Mummery CJ, Muralidharan KK, Nestorov I, Nisenbaum L, Rajagovindan R, Skordos L, Tian Y, van Dyck CH, Vellas B, Wu S, Zhu Y, Sandrock A (2022) Two randomized phase 3 studies of aducanumab in early Alzheimer's disease. *J Prev Alzheimers Dis* **9**, 197–210.
- [5] The Lancet (2022) Lecanemab for Alzheimer's disease: tempering hype and hope. *Lancet* **400**, 1899.
- [6] Wolk DA, Rabinovici GD, Dickerson BC (2023) A step forward in the fight against dementia-are we there yet? *JAMA Neurol* **80**, 429–430.
- [7] Walsh S, Merrick R, Milne R, Brayne C (2021) Aducanumab for Alzheimer's disease? *BMJ* **374**, n1682.
- [8] Vaz M, Silva V, Monteiro C, Silvestre S (2022) Role of aducanumab in the treatment of Alzheimer's disease: Challenges and opportunities. *Clin Interv Aging* **17**, 797–810.
- [9] Cummings J, Aisen P, Apostolova LG, Atri A, Salloway S, Weiner M (2021) Aducanumab: Appropriate Use Recommendations. *J Prev Alzheimers Dis* **8**, 398–410.
- [10] Cummings J, Apostolova L, Rabinovici GD, Atri A, Aisen P, Greenberg S, Hendrix S, Selkoe D, Weiner M, Petersen RC, Salloway S (2023) Lecanemab: Appropriate Use Recommendations. *J Prev Alzheimers Dis* **10**, 362–377.
- [11] Oliveira D, Bosco A, di Lorito C (2019) Is poor health literacy a risk factor for dementia in older adults? Systematic literature review of prospective cohort studies. *Maturitas* **124**, 8–14.
- [12] Abyadeh M, Djafarian K, Heydarinejad F, Alizadeh S, Shab-Bidar S (2019) Association between Apolipoprotein E Gene Polymorphism and Alzheimer's Disease in an Iranian Population: A Meta-Analysis. *J Mol Neurosci* **69**, 557–562.
- [13] Meng X-F, Yu J-T, Wang H-F, Tan M-S, Wang C, Tan C-C, Tan L (2014) Midlife vascular risk factors and the risk of Alzheimer's disease: a systematic review and meta-analysis. *J Alzheimers Dis* **42**, 1295–1310.
- [14] Shen L, Ji H-F (2015) Associations between Homocysteine, Folic Acid, Vitamin B12 and Alzheimer's Disease: Insights from Meta-Analyses. *J Alzheimers Dis* **46**, 777–790.
- [15] Gimson A, Schlosser M, Huntley JD, Marchant NL (2018) Support for midlife anxiety diagnosis as an independent risk factor for dementia: a systematic review. *BMJ Open* **8**, e019399.
- [16] Sherman RE, Anderson SA, Dal Pan GJ, Gray GW, Gross T, Hunter NL, LaVange L, Marinac-Dabic D, Marks PW, Robb MA, Shuren J, Temple R, Woodcock J, Yue LQ, Califf RM (2016) Real-world evidence - what is it and what can it tell us? *N Engl J Med* **375**, 2293–2297.

- [17] Concato J, Corrigan-Curay J (2022) Real-world evidence - where are we now? *N Engl J Med* **386**, 1680–1682.
- [18] Meystre SM, Savova GK, Kipper-Schuler KC, Hurdle JF (2008) Extracting information from textual documents in the electronic health record: a review of recent research. *Yearb Med Inform* 128–144.
- [19] Joshi P, Hendrie K, Jester DJ, Dasarathy D, Lavretsky H, Ku BS, Leutwyler H, Torous J, Jeste DV, Tampi RR (2023) Social connections as determinants of cognitive health and as targets for social interventions in persons with or at risk of Alzheimer’s disease and related disorders: a scoping review. *Int Psychogeriatr* 1–27.
- [20] Greene AN, Solomon MB, Privette Vinnedge LM (2022) Novel molecular mechanisms in Alzheimer’s disease: The potential role of DEK in disease pathogenesis. *Front Aging Neurosci* **14**, 1018180.
- [21] Vassilaki M, Petersen RC, Vemuri P (2022) Area deprivation index as a surrogate of resilience in aging and dementia. *Front Psychol* **13**, 930415.
- [22] Babulal GM, Rani R, Adkins-Jackson P, Pearson AC, Williams MM (2022) Associations between homelessness and Alzheimer’s disease and related dementia: A systematic review. *J Appl Gerontol* **41**, 2404–2413.
- [23] Balls-Berry JJE, Babulal GM (2022) Health disparities in dementia. *Continuum (Minneapolis)* **28**, 872–884.
- [24] Rubin L, Ingram LA, Resciniti NV, Ashford-Carroll B, Leith KH, Rose A, Ureña S, McCollum Q, Friedman DB (2021) Genetic risk factors for Alzheimer’s Disease in racial/ethnic minority populations in the U.s.: A scoping review. *Front Public Health* **9**, 784958.
- [25] Shannon OM, Ranson JM, Gregory S, Macpherson H, Milte C, Lentjes M, Mulligan A, McEvoy C, Griffiths A, Matu J, Hill TR, Adamson A, Siervo M, Minihane AM, Muniz-Tererra G, Ritchie C, Mathers JC, Llewellyn DJ, Stevenson E (2023) Mediterranean diet adherence is associated with lower dementia risk, independent of genetic predisposition: findings from the UK Biobank prospective cohort study. *BMC Med* **21**, 81.
- [26] Hogan WR, Shenkman EA, Robinson T, Carasquillo O, Robinson PS, Essner RZ, Bian J, Lipori G, Harle C, Magoc T, Manini L, Mendoza T, White S, Loiacono A, Hall J, Nelson D (2021) The OneFlorida Data Trust: a centralized, translational research data infrastructure of statewide scope. *J Am Med Inform Assoc*.
- [27] Liang Y, Wang L (2017) Alzheimer’s disease is an important risk factor of fractures: A meta-analysis of cohort studies. *Mol Neurobiol* **54**, 3230–3235.
- [28] Abdelhafiz AH, McNicholas E, Sinclair AJ (2016) Hypoglycemia, frailty and dementia in older people with diabetes: Reciprocal relations and clinical implications. *J Diabetes Complications* **30**, 1548–1554.
- [29] Mazzucco S, Diomedi M, Qureshi A, Sainati L, Padayachee ST (2017) Transcranial Doppler screening for stroke risk in children with sickle cell disease: a systematic review. *Int J Stroke* **12**, 580–588.
- [30] Belvederi Murri M, Prestia D, Mondelli V, Pariante C, Patti S, Olivieri B, Arzani C, Masotti M, Respino M, Antonioli M, Vassallo L, Serafini G, Perna G, Pompili M, Amore M (2016)

The HPA axis in bipolar disorder: Systematic review and meta-analysis.

*Psychoneuroendocrinology* **63**, 327–342.

- [31] Power MC, Weuve J, Sharrett AR, Blacker D, Gottesman RF (2015) Statins, cognition, and dementia—systematic review and methodological commentary. *Nat Rev Neurol* **11**, 220–229.
- [32] Han X-M, Wang C-H, Sima X, Liu S-Y (2011) Interleukin-6 -174G/C polymorphism and the risk of Alzheimer’s disease in Caucasians: a meta-analysis. *Neurosci Lett* **504**, 4–8.
- [33] Amraei M, Mohamadpour R, Moayeri A, Abbasi N, Shirzadpour E, Mohamadpour M (2017) Vitamin D and its association with memory and learning: A systematic review and meta-analysis. *Biomed Res* **28**, 7427–7433.
- [34] Al-Khazraji BK, Appleton CT, Beier F, Birmingham TB, Shoemaker JK (2018) Osteoarthritis, cerebrovascular dysfunction and the common denominator of inflammation: a narrative review. *Osteoarthritis Cartilage* **26**, 462–470.
- [35] Beauchet O, Annweiler C, Callisaya ML, De Cock A-M, Helbostad JL, Kressig RW, Srikanth V, Steinmetz J-P, Blumen HM, Verghese J, Allali G (2016) Poor gait performance and prediction of dementia: Results from a meta-analysis. *J Am Med Dir Assoc* **17**, 482–490.
- [36] Ma F-C, Wang H-F, Cao X-P, Tan C-C, Tan L, Yu J-T (2018) Meta-analysis of the association between variants in ABCA7 and Alzheimer’s disease. *J Alzheimers Dis* **63**, 1261–1267.
- [37] Simning A, Simons KV (2017) Treatment of depression in nursing home residents without significant cognitive impairment: a systematic review. *Int Psychogeriatr* **29**, 209–226.
- [38] Woolford MH, Weller C, Ibrahim JE (2017) Unexplained absences and risk of death and injury among nursing home residents: A systematic review. *J Am Med Dir Assoc* **18**, 366.e1-366.e15.
- [39] Witoelar A, Rongve A, Almdahl IS, Ulstein ID, Engvig A, White LR, Selbæk G, Stordal E, Andersen F, Brækhus A, Saltvedt I, Engedal K, Hughes T, Bergh S, Bråthen G, Bogdanovic N, Bettella F, Wang Y, Athanasiu L, Bahrami S, Le Hellard S, Giddaluru S, Dale AM, Sando SB, Steinberg S, Stefansson H, Snaedal J, Desikan RS, Stefansson K, Aarsland D, Djurovic S, Fladby T, Andreassen OA (2018) Meta-analysis of Alzheimer’s disease on 9,751 samples from Norway and IGAP study identifies four risk loci. *Sci Rep* **8**, 18088.
- [40] Rawat S, Jugran AK, Bhatt ID, Rawal RS (2018) *Hedychium spicatum*: a systematic review on traditional uses, phytochemistry, pharmacology and future prospectus. *J Pharm Pharmacol* **70**, 687–712.
- [41] Farzaei MH, Shahpiri Z, Bahramsoltani R, Nia MM, Najafi F, Rahimi R (2017) Efficacy and tolerability of phytomedicines in multiple sclerosis patients: A review. *CNS Drugs* **31**, 867–889.
- [42] Chareamboon T, Jaisin K (2015) Ginkgo biloba for prevention of dementia: a systematic review and meta-analysis. *J Med Assoc Thai* **98**, 508–513.
- [43] Pratap GK, Ashwini S, Shantaram M (2017) ALZHEIMER’S DISEASE: A CHALLENGE IN MANAGING WITH CERTAIN MEDICINAL PLANTS - A REVIEW. *International Journal of Pharmaceutical Sciences and Research* **4**, 4960–4972.
- [44] Yorek MA (2017) Is fish oil a potential treatment for diabetic peripheral neuropathy? *Curr Diabetes Rev* **14**, 339–349.
- [45] Donohue MC, Sperling RA, Salmon DP, Rentz DM, Raman R, Thomas RG, Weiner M, Aisen PS, Australian Imaging, Biomarkers, and Lifestyle Flagship Study of Ageing,

- Alzheimer's Disease Neuroimaging Initiative, Alzheimer's Disease Cooperative Study (2014) The preclinical Alzheimer cognitive composite: measuring amyloid-related decline. *JAMA Neurol* **71**, 961–970.
- [46] Liu S-Y, Zeng F-F, Chen Z-W, Wang C-Y, Zhao B, Li K-S (2013) Vascular endothelial growth factor gene promoter polymorphisms and Alzheimer's disease risk: a meta-analysis. *CNS Neurosci Ther* **19**, 469–476.
- [47] Parnetti L, Chipi E, Salvadori N, D'Andrea K, Eusebi P (2019) Prevalence and risk of progression of preclinical Alzheimer's disease stages: a systematic review and meta-analysis. *Alzheimers Res Ther* **11**, 7.
- [48] Jansen WJ, Ossenkuppele R, Knol DL, Tijms BM, Scheltens P, Verhey FRJ, Visser PJ, Amyloid Biomarker Study Group, Aalten P, Aarsland D, Alcolea D, Alexander M, Almdahl IS, Arnold SE, Baldeiras I, Barthel H, van Berckel BNM, Bibeau K, Blennow K, Brooks DJ, van Buchem MA, Camus V, Cavedo E, Chen K, Chetelat G, Cohen AD, Drzezga A, Engelborghs S, Fagan AM, Fladby T, Fleisher AS, van der Flier WM, Ford L, Förster S, Fortea J, Foskett N, Frederiksen KS, Freund-Levi Y, Frisoni GB, Froelich L, Gabryelewicz T, Gill KD, Gkatzima O, Gómez-Tortosa E, Gordon MF, Grimmer T, Hampel H, Hausner L, Hellwig S, Herukka S-K, Hildebrandt H, Ishihara L, Ivanoiu A, Jagust WJ, Johannsen P, Kandimalla R, Kapaki E, Klimkowicz-Mrowiec A, Klunk WE, Köhler S, Koglin N, Kornhuber J, Kramberger MG, Van Laere K, Landau SM, Lee DY, de Leon M, Lisetti V, Lleó A, Madsen K, Maier W, Marcusson J, Mattsson N, de Mendonça A, Meulenberg O, Meyer PT, Mintun MA, Mok V, Molinuevo JL, Møllergård HM, Morris JC, Mroczko B, Van der Mussele S, Na DL, Newberg A, Nordberg A, Nordlund A, Novak GP, Paraskevas GP, Parnetti L, Perera G, Peters O, Popp J, Prabhakar S, Rabinovici GD, Ramakers IHGB, Rami L, Resende de Oliveira C, Rinne JO, Rodrigue KM, Rodríguez-Rodríguez E, Roe CM, Rot U, Rowe CC, Rütger E, Sabri O, Sanchez-Juan P, Santana I, Sarazin M, Schröder J, Schütte C, Seo SW, Soetewey F, Soininen H, Spuru L, Struyfs H, Teunissen CE, Tsolaki M, Vandenberghe R, Verbeek MM, Villemagne VL, Vos SJB, van Waalwijk van Doorn LJC, Waldemar G, Wallin A, Wallin ÅK, Wiltfang J, Wolk DA, Zboch M, Zetterberg H (2015) Prevalence of cerebral amyloid pathology in persons without dementia: a meta-analysis. *JAMA* **313**, 1924–1938.
- [49] Momtaz S, Hassani S, Khan F, Ziaee M, Abdollahi M (2018) Cinnamon, a promising prospect towards Alzheimer's disease. *Pharmacol Res* **130**, 241–258.
- [50] Hudson M, Nowak C, Garling RJ, Harris C (2019) Comorbidity of diabetes mellitus in idiopathic normal pressure hydrocephalus: a systematic literature review. *Fluids Barriers CNS* **16**, 5.
- [51] Tang EY, Amiesimaka O, Harrison SL, Green E, Price C, Robinson L, Siervo M, Stephan BC (2018) Longitudinal effect of stroke on cognition: A systematic review. *J Am Heart Assoc* **7**,.
- [52] Theoharides TC, Tsilioni I (2018) Tetramethoxyluteolin for the treatment of neurodegenerative diseases. *Curr Top Med Chem* **18**, 1872–1882.
- [53] Beckett MW, Ardern CI, Rotondi MA (2015) A meta-analysis of prospective studies on the role of physical activity and the prevention of Alzheimer's disease in older adults. *BMC Geriatr* **15**, 9.

- [54] Dong X, Zhang L, Meng Q, Gao Q (2017) Association Between Interleukin-1A, Interleukin-1B, and Bridging integrator 1 Polymorphisms and Alzheimer's Disease: a standard and Cumulative Meta-analysis. *Mol Neurobiol* **54**, 736–747.
- [55] Kok RM, Reynolds CF 3rd (2017) Management of depression in older adults: A review. *JAMA* **317**, 2114–2122.
- [56] Moulin S, Leys D, Schraen-Maschke S, Bombois S, Mendyk A-M, Muhr-Tailleux A, Cordonnier C, Buee L, Pasquier F, Bordet R (2017) A $\beta$ 1-40 and A $\beta$ 1-42 plasmatic levels in stroke: Influence of pre-existing cognitive status and stroke characteristics. *Curr Alzheimer Res* **14**, 686–694.
- [57] Giannopoulos S, Katsanos AH, Kosmidou M, Tsvigoulis G (2014) Statins and vascular dementia: a review. *J Alzheimers Dis* **42 Suppl 3**, S315-20.
- [58] Zheng Y, Fan S, Liao W, Fang W, Xiao S, Liu J (2017) Hearing impairment and risk of Alzheimer's disease: a meta-analysis of prospective cohort studies. *Neurol Sci* **38**, 233–239.
- [59] Durg S, Dhadde SB, Vandal R, Shivakumar BS, Charan CS (2015) Withania somnifera (Ashwagandha) in neurobehavioural disorders induced by brain oxidative stress in rodents: a systematic review and meta-analysis. *J Pharm Pharmacol* **67**, 879–899.
- [60] Lipnicki DM, Makkar SR, Crawford JD, Thalamuthu A, Kochan NA, Lima-Costa MF, Castro-Costa E, Ferri CP, Brayne C, Stephan B, Llibre-Rodriguez JJ, Llibre-Guerra JJ, Valhuerdi-Cepero AJ, Lipton RB, Katz MJ, Derby CA, Ritchie K, Ancelin M-L, Carrière I, Scarmeas N, Yannakoulia M, Hadjigeorgiou GM, Lam L, Chan W-C, Fung A, Guaita A, Vaccaro R, Davin A, Kim KW, Han JW, Suh SW, Riedel-Heller SG, Roehr S, Pabst A, van Boxtel M, Köhler S, Deckers K, Ganguli M, Jacobsen EP, Hughes TF, Anstey KJ, Cherbuin N, Haan MN, Aiello AE, Dang K, Kumagai S, Chen T, Narazaki K, Ng TP, Gao Q, Nyunt MSZ, Scazufca M, Brodaty H, Numbers K, Trollor JN, Meguro K, Yamaguchi S, Ishii H, Lobo A, Lopez-Anton R, Santabábara J, Leung Y, Lo JW, Popovic G, Sachdev PS, for Cohort Studies of Memory in an International Consortium (COSMIC) (2019) Determinants of cognitive performance and decline in 20 diverse ethno-regional groups: A COSMIC collaboration cohort study. *PLoS Med* **16**, e1002853.
- [61] Matta Mello Portugal E, Cevada T, Sobral Monteiro-Junior R, Teixeira Guimarães T, da Cruz Rubini E, Lattari E, Blois C, Camaz Deslandes A (2013) Neuroscience of exercise: from neurobiology mechanisms to mental health. *Neuropsychobiology* **68**, 1–14.
- [62] Riederer P, Korczyn AD, Ali SS, Bajenaru O, Choi MS, Chopp M, Dermanovic-Dobrota V, Grünblatt E, Jellinger KA, Kamal MA, Kamal W, Leszek J, Sheldrick-Michel TM, Mushtaq G, Meglic B, Natovich R, Pirtosek Z, Rakusa M, Salkovic-Petrisic M, Schmidt R, Schmitt A, Sridhar GR, Vécsei L, Wojszel ZB, Yaman H, Zhang ZG, Cukierman-Yaffe T (2017) The diabetic brain and cognition. *J Neural Transm (Vienna)* **124**, 1431–1454.
- [63] Creese B, Bell E, Johar I, Francis P, Ballard C, Aarsland D (2018) Glucocerebrosidase mutations and neuropsychiatric phenotypes in Parkinson's disease and Lewy body dementias: Review and meta-analyses. *Am J Med Genet B Neuropsychiatr Genet* **177**, 232–241.
- [64] Wajman JR, Mansur LL, Yassuda MS (2018) Lifestyle patterns as a modifiable risk factor for late-life cognitive decline: A narrative review regarding dementia prevention. *Curr Aging Sci* **11**, 90–99.



- [65] Jääskeläinen E, Haapea M, Rautio N, Juola P, Penttilä M, Nordström T, Rissanen I, Husa A, Keskinen E, Marttila R, Filatova S, Paaso T-M, Koivukangas J, Moilanen K, Isohanni M, Miettunen J (2015) Twenty years of schizophrenia research in the Northern Finland Birth Cohort 1966: A systematic review. *Schizophr Res Treatment* **2015**, 524875.
- [66] Allen GI, Amoroso N, Anghel C, Balagurusamy V, Bare CJ, Beaton D, Bellotti R, Bennett DA, Boehme KL, Boutros PC, Caberlotto L, Caloian C, Campbell F, Chaibub Neto E, Chang Y-C, Chen B, Chen C-Y, Chien T-Y, Clark T, Das S, Davatzikos C, Deng J, Dillenberger D, Dobson RJB, Dong Q, Doshi J, Duma D, Errico R, Erus G, Everett E, Fardo DW, Friend SH, Fröhlich H, Gan J, St George-Hyslop P, Ghosh SS, Glaab E, Green RC, Guan Y, Hong M-Y, Huang C, Hwang J, Ibrahim J, Inglese P, Iyappan A, Jiang Q, Katsumata Y, Kauwe JSK, Klein A, Kong D, Krause R, Lalonde E, Lauria M, Lee E, Lin X, Liu Z, Livingstone J, Logsdon BA, Lovestone S, Ma T-W, Malhotra A, Mangravite LM, Maxwell TJ, Merrill E, Nagorski J, Namasivayam A, Narayan M, Naz M, Newhouse SJ, Norman TC, Nurtdinov RN, Oyang Y-J, Pawitan Y, Peng S, Peters MA, Piccolo SR, Praveen P, Priami C, Sabelnykova VY, Senger P, Shen X, Simmons A, Sotiras A, Stolovitzky G, Tangaro S, Tateo A, Tung Y-A, Tustison NJ, Varol E, Vradenburg G, Weiner MW, Xiao G, Xie L, Xie Y, Xu J, Yang H, Zhan X, Zhou Y, Zhu F, Zhu H, Zhu S, Alzheimer's Disease Neuroimaging Initiative (2016) Crowdsourced estimation of cognitive decline and resilience in Alzheimer's disease. *Alzheimers Dement* **12**, 645–653.
- [67] Costa IM, Lima FOV, Fernandes LCB, Norrara B, Neta FI, Alves RD, Cavalcanti JRLP, Lucena EES, Cavalcante JS, Rego ACM, Filho IA, Queiroz DB, Freire MAM, Guzen FP (2019) Astragaloside IV supplementation promotes A neuroprotective effect in experimental models of neurological disorders: A systematic review. *Curr Neuropharmacol* **17**, 648–665.
- [68] Sami M, Khan H, Nilforooshan R (2015) Late onset mania as an organic syndrome: A review of case reports in the literature. *J Affect Disord* **188**, 226–231.
- [69] *On the central role of mitochondria dysfunction and oxidative stress in Alzheimers disease.*
- [70] Yates LA, Ziser S, Spector A, Orrell M (2016) Cognitive leisure activities and future risk of cognitive impairment and dementia: systematic review and meta-analysis. *Int Psychogeriatr* **28**, 1791–1806.
- [71] Mueller C, Soysal P, Rongve A, Isik AT, Thompson T, Maggi S, Smith L, Basso C, Stewart R, Ballard C, O'Brien JT, Aarsland D, Stubbs B, Veronese N (2019) Survival time and differences between dementia with Lewy bodies and Alzheimer's disease following diagnosis: A meta-analysis of longitudinal studies. *Ageing Res Rev* **50**, 72–80.
- [72] Almeida OP, Hankey GJ, Yeap BB, Paul Chubb SA, Gollege J, Flicker L (2018) Risk of prevalent and incident dementia associated with insulin-like growth factor and insulin-like growth factor-binding protein 3. *Mol Psychiatry* **23**, 1825–1829.
- [73] Ettcheto M, Olloquequi J, Sánchez-López E, Busquets O, Cano A, Manzine PR, Beas-Zarate C, Castro-Torres RD, García ML, Bulló M, Auladell C, Folch J, Camins A (2019) Benzodiazepines and related drugs as a risk factor in Alzheimer's disease dementia. *Front Aging Neurosci* **11**, 344.
- [74] Desai CS, Martin SS, Blumenthal RS (2014) Non-cardiovascular effects associated with statins. *BMJ* **349**, g3743.

- [75] May BH, Feng M, Hyde AJ, Hügel H, Chang S-Y, Dong L, Guo X, Zhang AL, Lu C, Xue CC (2018) Comparisons between traditional medicines and pharmacotherapies for Alzheimer disease: A systematic review and meta-analysis of cognitive outcomes. *Int J Geriatr Psychiatry* **33**, 449–458.
- [76] Danat IM, Clifford A, Partridge M, Zhou W, Bakre AT, Chen A, McFeeters D, Smith T, Wan Y, Copeland J, Anstey KJ, Chen R (2019) Impacts of overweight and obesity in older age on the risk of dementia: A systematic literature review and a meta-analysis. *J Alzheimers Dis* **70**, S87–S99.
- [77] Koch M, Jensen MK (2016) HDL-cholesterol and apolipoproteins in relation to dementia. *Curr Opin Lipidol* **27**, 76–87.
- [78] Hargis KE, Blalock EM (2017) Transcriptional signatures of brain aging and Alzheimer’s disease: What are our rodent models telling us? *Behav Brain Res* **322**, 311–328.
- [79] *Resolution of inflammation, n-3 fatty acid supplementation and Alzheimer disease: A narrative review.*
- [80] Snowden MB, Steinman LE, Bryant LL, Cherrier MM, Greenlund KJ, Leith KH, Levy C, Logsdon RG, Copeland C, Vogel M, Anderson LA, Atkins DC, Bell JF, Fitzpatrick AL (2017) Dementia and co-occurring chronic conditions: a systematic literature review to identify what is known and where are the gaps in the evidence? *Int J Geriatr Psychiatry* **32**, 357–371.
- [81] Kuring JK, Mathias JL, Ward L (2018) Prevalence of depression, anxiety and PTSD in people with dementia: A systematic review and meta-analysis. *Neuropsychol Rev* **28**, 393–416.
- [82] Min M, Shi T, Sun C, Liang M, Zhang Y, Tian S, Sun Y (2020) The association between orthostatic hypotension and cognition and stroke: a meta-analysis of prospective cohort studies. *Blood Press* **29**, 3–12.
- [83] Egan KJ, Vesterinen HM, Beglopoulos V, Sena ES, Macleod MR (2016) From a mouse: systematic analysis reveals limitations of experiments testing interventions in Alzheimer’s disease mouse models. *Evid Based Preclin Med* **3**, e00015.
- [84] Goodwill AM, Szoek C (2017) A systematic review and meta-analysis of the effect of low vitamin D on cognition. *J Am Geriatr Soc* **65**, 2161–2168.
- [85] Forbes SC, Holroyd-Leduc JM, Poulin MJ, Hogan DB (2015) Effect of nutrients, dietary supplements and vitamins on cognition: A systematic review and meta-analysis of randomized controlled trials. *Can Geriatr J* **18**, 231–245.
- [86] Chalfont G, Milligan C, Simpson J (2020) A mixed methods systematic review of multimodal non-pharmacological interventions to improve cognition for people with dementia. *Dementia* **19**, 1086–1130.
- [87] DeRight J, Jorgensen RS, Cabral MJ (2015) Composite cardiovascular risk scores and neuropsychological functioning: a meta-analytic review. *Ann Behav Med* **49**, 344–357.
- [88] Penninkilampi R, Casey A-N, Singh MF, Brodaty H (2018) The association between social engagement, loneliness, and risk of dementia: A systematic review and meta-analysis. *J Alzheimers Dis* **66**, 1619–1633.
- [89] Ford AH (2016) Preventing delirium in dementia: Managing risk factors. *Maturitas* **92**, 35–40.

- [90] O'Brien J, Jackson JW, Grodstein F, Blacker D, Weuve J (2014) Postmenopausal hormone therapy is not associated with risk of all-cause dementia and Alzheimer's disease. *Epidemiol Rev* **36**, 83–103.
- [91] Ma J, Zhang W, Wang H-F, Wang Z-X, Jiang T, Tan M-S, Yu J-T, Tan L (2016) Peripheral blood adipokines and insulin levels in patients with Alzheimer's disease: A replication study and meta-analysis. *Curr Alzheimer Res* **13**, 223–233.
- [92] Weiland A, Wang Y, Wu W, Lan X, Han X, Li Q, Wang J (2019) Ferroptosis and its role in diverse brain diseases. *Mol Neurobiol* **56**, 4880–4893.
- [93] *Mitochondria- And oxidative stress-targeting substances in cognitive decline-related disorders- And molecular mechanisms to clinical evidence.*
- [94] Lucchetta RC, da Mata BPM, Mastroianni P de C (2018) Association between development of dementia and use of benzodiazepines: A systematic review and meta-analysis. *Pharmacotherapy* **38**, 1010–1020.
- [95] Ford AH, Almeida OP (2015) Pharmacological interventions for preventing delirium in the elderly. *Maturitas* **81**, 287–292.
- [96] *Can Yoga-Based Diabetes Management Studies Facilitate Integrative Medicine in India Current Status and Future Directions.*
- [97] Zhao E, Lowres N, Woolaston A, Naismith SL, Gallagher R (2020) Prevalence and patterns of cognitive impairment in acute coronary syndrome patients: A systematic review. *Eur J Prev Cardiol* **27**, 284–293.
- [98] Hendriks LEL, Schoenmaekers J, Zindler JD, Eekers DBP, Hoeben A, De Ruyscher DKM, Dingemans A-MC (2015) Safety of cranial radiotherapy concurrent with tyrosine kinase inhibitors in non-small cell lung cancer patients: A systematic review. *Cancer Treat Rev* **41**, 634–645.
- [99] Howes LG (2014) Cardiovascular effects of drugs used to treat Alzheimer's disease. *Drug Saf* **37**, 391–395.
- [100] Jensen LE, Padilla R (2011) Effectiveness of interventions to prevent falls in people with Alzheimer's disease and related dementias. *Am J Occup Ther* **65**, 532–540.
- [101] Deví Bastida J, Genescà Pujol J, Valle Vives S, Jofre Font S, Fetscher Eickhoff A, Arroyo Cardona E (2019) Disorder of the personality: a possible factor of risk for the dementia. *Actas Esp Psiquiatr* **47**, 61–69.
- [102] Wylęgała A (2018) Principles of OCTA and applications in clinical neurology. *Curr Neurol Neurosci Rep* **18**, 96.
- [103] van den Berg E, Geerlings MI, Biessels GJ, Nederkoorn PJ, Kloppenborg RP (2018) White matter hyperintensities and cognition in mild cognitive impairment and Alzheimer's disease: A domain-specific meta-analysis. *J Alzheimers Dis* **63**, 515–527.
- [104] Gagnon M, Barrette J, Maccoir J (2018) Language disorders in Huntington disease: A systematic literature review. *Cogn Behav Neurol* **31**, 179–192.
- [105] Dwyer R, Stoelwinder J, Gabbe B, Lowthian J (2015) Unplanned transfer to emergency departments for frail elderly residents of aged care facilities: A review of patient and organizational factors. *J Am Med Dir Assoc* **16**, 551–562.
- [106] Pedersen GA, Zajkowska Z, Kieling C, Gautam K, Mondelli V, Fisher HL, Swartz JR, Adewuya A, Karmacharya R, Kohrt BA (2019) Protocol for a systematic review of the

- development of depression among adolescents and young adults: psychological, biological, and contextual perspectives around the world. *Syst Rev* **8**, 179.
- [107] *Effects of vasodilating medications on cerebral Haemodynamics in health and disease: Systematic Review and meta-analysis.*
- [108] Rochoy M, Rivas V, Chazard E, Decarpentry E, Saudemont G, Hazard P-A, Puisieux F, Gautier S, Bordet R (2019) Factors associated with Alzheimer's disease: An overview of reviews. *J Prev Alzheimers Dis* **6**, 121–134.
- [109] Rensma SP, van Sloten TT, Launer LJ, Stehouwer CDA (2018) Cerebral small vessel disease and risk of incident stroke, dementia and depression, and all-cause mortality: A systematic review and meta-analysis. *Neurosci Biobehav Rev* **90**, 164–173.
- [110] Franks PW, Atabaki-Pasdar N (2017) Causal inference in obesity research. *J Intern Med* **281**, 222–232.
- [111] Yuan H, Du L, Ge P, Wang X, Xia Q (2018) Association of microtubule-associated protein tau gene polymorphisms with the risk of sporadic Alzheimer's disease: a meta-analysis. *Int J Neurosci* **128**, 577–585.
- [112] Schrag M, Mueller C, Zabel M, Crofton A, Kirsch WM, Ghribi O, Squitti R, Perry G (2013) Oxidative stress in blood in Alzheimer's disease and mild cognitive impairment: a meta-analysis. *Neurobiol Dis* **59**, 100–110.
- [113] Vreeman RC, Scanlon ML, McHenry MS, Nyandiko WM (2015) The physical and psychological effects of HIV infection and its treatment on perinatally HIV-infected children. *J Int AIDS Soc* **18**, 20258.
- [114] Ghafar MZAA, Miptah HN, O'Caomh R (2019) Cognitive screening instruments to identify vascular cognitive impairment: A systematic review. *Int J Geriatr Psychiatry* **34**, 1114–1127.
- [115] Donovan J, Cancelliere C, Cassidy JD (2014) Summary of the findings of the International Collaboration on Mild Traumatic Brain Injury Prognosis. *Chiropr Man Therap* **22**, 38.
- [116] Nordestgaard LT, Tybjaerg-Hansen A, Rasmussen KL, Nordestgaard BG, Frikke-Schmidt R (2018) Genetic variation in clusterin and risk of dementia and ischemic vascular disease in the general population: cohort studies and meta-analyses of 362,338 individuals. *BMC Med* **16**, 39.
- [117] Canevelli M, Bruno G, Vico C, Zaccaria V, Lacorte E, Iavicoli I, Vanacore N, Cesari M (2018) Socioeconomic disparities in clinical trials on Alzheimer's disease: a systematic review. *Eur J Neurol* **25**, 626-e43.
- [118] Bloomfield HE, Koeller E, Greer N, MacDonald R, Kane R, Wilt TJ (2016) Effects on health outcomes of a Mediterranean diet with no restriction on fat intake: A systematic review and meta-analysis. *Ann Intern Med* **165**, 491–500.
- [119] *Associations Between H Folic Acid, Vitamin B12 and Alzheimer's Disease: Insights from Meta-Analyses.*
- [120] Ray CA, Ingram V, Cohen-Mansfield J (2015) Systematic review of planned care transitions for persons with dementia. *Neurodegener Dis Manag* **5**, 317–331.

- [121] Weston PSJ, Simpson IJA, Ryan NS, Ourselin S, Fox NC (2015) Diffusion imaging changes in grey matter in Alzheimer's disease: a potential marker of early neurodegeneration. *Alzheimers Res Ther* **7**, 47.
- [122] De Guio F, Duering M, Fazekas F, De Leeuw F-E, Greenberg SM, Pantoni L, Aghetti A, Smith EE, Wardlaw J, Jouvent E (2020) Brain atrophy in cerebral small vessel diseases: Extent, consequences, technical limitations and perspectives: The HARNESS initiative. *J Cereb Blood Flow Metab* **40**, 231–245.
- [123] de Wilde A, van Buchem MM, Otten RHJ, Bouwman F, Stephens A, Barkhof F, Scheltens P, van der Flier WM (2018) Disclosure of amyloid positron emission tomography results to individuals without dementia: a systematic review. *Alzheimers Res Ther* **10**, 72.
- [124] Navipour E, Neamatshahi M, Barabadi Z, Neamatshahi M, Keykhosravi A (2019) Epidemiology and risk factors of Alzheimer's disease in Iran: A systematic review. *Iran J Public Health* **48**, 2133–2139.
- [125] Egan KJ, Pinto-Bruno AC, Bighelli I, Berg-Weger M, van Straten A, Albanese E, Pot A-M (2018) Online training and support programs designed to improve mental health and reduce burden among caregivers of people with dementia: A systematic review. *J Am Med Dir Assoc* **19**, 200-206.e1.
- [126] Wang X-F, Lin X, Li D-Y, Zhou R, Greenbaum J, Chen Y-C, Zeng C-P, Peng L-P, Wu K-H, Ao Z-X, Lu J-M, Guo Y-F, Shen J, Deng H-W (2017) Linking Alzheimer's disease and type 2 diabetes: Novel shared susceptibility genes detected by cFDR approach. *J Neurol Sci* **380**, 262–272.
- [127] Siklos M, BenAissa M, Thatcher GRJ (2015) Cysteine proteases as therapeutic targets: does selectivity matter? A systematic review of calpain and cathepsin inhibitors. *Acta Pharm Sin B* **5**, 506–519.
- [128] Mohammad S, Nguyen H, Nguyen M, Abdel-Rasoul M, Nguyen V, Nguyen CD, Nguyen KT, Li L, Kitzmiller JP (2019) Pleiotropic effects of statins: Untapped potential for statin pharmacotherapy. *Curr Vasc Pharmacol* **17**, 239–261.
- [129] Li F-J, Shen L, Ji H-F (2012) Dietary intakes of vitamin E, vitamin C, and  $\beta$ -carotene and risk of Alzheimer's disease: a meta-analysis. *J Alzheimers Dis* **31**, 253–258.
- [130] Karlsson WK, Sørensen CG, Kruuse C (2017) l-arginine and l-NMMA for assessing cerebral endothelial dysfunction in ischaemic cerebrovascular disease: A systematic review. *Clin Exp Pharmacol Physiol* **44**, 13–20.
- [131] Dolan C, Glynn R, Lawlor B (2020) A systematic review and Delphi study to ascertain common risk factors for type 2 diabetes mellitus and dementia and brain-related complications of diabetes in adults. *Can J Diabetes* **44**, 628–635.
- [132] Vlaeyen E, Coussement J, Leysens G, Van der Elst E, Delbaere K, Cambier D, Denhaerynck K, Goemaere S, Wertelaers A, Dobbels F, Dejaeger E, Milisen K, Center of Expertise for Fall and Fracture Prevention Flanders (2015) Characteristics and effectiveness of fall prevention programs in nursing homes: a systematic review and meta-analysis of randomized controlled trials. *J Am Geriatr Soc* **63**, 211–221.
- [133] Solanki RK, Dubey V, Munshi D (2009) Neurocognitive impairment and comorbid depression in patients of diabetes mellitus. *Int J Diabetes Dev Ctries* **29**, 133–138.

- [134] Polyakova M, Sonnabend N, Sander C, Mergl R, Schroeter ML, Schroeder J, Schönknecht P (2014) Prevalence of minor depression in elderly persons with and without mild cognitive impairment: a systematic review. *J Affect Disord* **152–154**, 28–38.
- [135] El Kadmiri N, Said N, Slassi I, El Moutawakil B, Nadifi S (2018) Biomarkers for Alzheimer disease: Classical and novel candidates' review. *Neuroscience* **370**, 181–190.
- [136] Ning M, Lo EH, Ning P-C, Xu S-Y, McMullin D, Demirjian Z, Inglessis I, Dec GW, Palacios I, Buonanno FS (2013) The brain's heart - therapeutic opportunities for patent foramen ovale (PFO) and neurovascular disease. *Pharmacol Ther* **139**, 111–123.
- [137] Yaffe K (2018) Modifiable risk factors and prevention of dementia: What is the latest evidence? *JAMA Intern Med* **178**, 281–282.
- [138] Resciniti NV, Tang W, Tabassum M, Pearson JL, Spencer SM, Lohman MC, Ehlers DK, Al-Hasan D, Miller MC, Teixeira A, Friedman DB (2020) Knowledge evaluation instruments for dementia caregiver education programs: A scoping review. *Geriatr Gerontol Int* **20**, 397–413.
- [139] Islam MM, Poly TN, Walther BA, Dubey NK, Anggraini Ningrum DN, Shabbir S-A, Jack Li Y-C (2018) Adverse outcomes of long-term use of proton pump inhibitors: a systematic review and meta-analysis. *Eur J Gastroenterol Hepatol* **30**, 1395–1405.
- [140] Cancelliere C, Cassidy JD, Li A, Donovan J, Côté P, Hincapié CA (2014) Systematic search and review procedures: results of the International Collaboration on Mild Traumatic Brain Injury Prognosis. *Arch Phys Med Rehabil* **95**, S101-31.
- [141] Sarker MR, Franks SF (2018) Efficacy of curcumin for age-associated cognitive decline: a narrative review of preclinical and clinical studies. *GeroScience* **40**, 73–95.
- [142] Loures C de MG, Duarte RCF, Silva MVF, Cicarini WB, de Souza LC, Caramelli P, Borges KBG, Carvalho M das G (2019) Hemostatic abnormalities in dementia: A systematic review and meta-analysis. *Semin Thromb Hemost* **45**, 514–522.
- [143] Bennett JM, Chekaluk E, Batchelor J (2016) Cognitive tests and determining fitness to drive in dementia: A systematic review. *J Am Geriatr Soc* **64**, 1904–1917.
- [144] Benny A, Thomas J (2019) Essential oils as treatment strategy for Alzheimer's disease: Current and future perspectives. *Planta Med* **85**, 239–248.
- [145] Klimek L, Kündig T, Kramer MF, Guethoff S, Jensen-Jarolim E, Schmidt-Weber CB, Palomares O, Mohsen MO, Jakob T, Bachmann M (2018) Virus-like particles (VLP) in prophylaxis and immunotherapy of allergic diseases. *Allergo J Int* **27**, 245–255.
- [146] Smith TO, Cooper A, Peryer G, Griffiths R, Fox C, Cross J (2017) Factors predicting incidence of post-operative delirium in older people following hip fracture surgery: a systematic review and meta-analysis. *Int J Geriatr Psychiatry* **32**, 386–396.
- [147] Chan JYC, Yiu KKL, Kwok TCY, Wong SYS, Tsoi KKF (2019) Depression and antidepressants as potential risk factors in dementia: A systematic review and meta-analysis of 18 longitudinal studies. *J Am Med Dir Assoc* **20**, 279-286.e1.
- [148] Cao G-Y, Li M, Han L, Tayie F, Yao S-S, Huang Z, Ai P, Liu Y-Z, Hu Y-H, Xu B (2019) Dietary fat intake and cognitive function among older populations: A systematic review and meta-analysis. *J Prev Alzheimers Dis* **6**, 204–211.

- [149] Mortamais M, Ash JA, Harrison J, Kaye J, Kramer J, Randolph C, Pose C, Albala B, Ropacki M, Ritchie CW, Ritchie K (2017) Detecting cognitive changes in preclinical Alzheimer's disease: A review of its feasibility. *Alzheimers Dement* **13**, 468–492.
- [150] Shepherd H, Livingston G, Chan J, Sommerlad A (2019) Hospitalisation rates and predictors in people with dementia: a systematic review and meta-analysis. *BMC Med* **17**, 130.
- [151] *Quantifying observational evidence for risk of dementia following androgen deprivation therapy for prostate cancer: an updated systematic review and m... Show all.*
- [152] Perry DC, Sturm VE, Peterson MJ, Pieper CF, Bullock T, Boeve BF, Miller BL, Guskiewicz KM, Berger MS, Kramer JH, Welsh-Bohmer KA (2016) Association of traumatic brain injury with subsequent neurological and psychiatric disease: a meta-analysis. *J Neurosurg* **124**, 511–526.
- [153] Stephan BCM, Birdi R, Tang EYH, Cosco TD, Donini LM, Licher S, Ikram MA, Siervo M, Robinson L (2018) Secular trends in dementia prevalence and incidence worldwide: A systematic review. *J Alzheimers Dis* **66**, 653–680.
- [154] Mokhar A, Topp J, Härter M, Schulz H, Kuhn S, Verthein U, Dirmaier J (2018) Patient-centered care interventions to reduce the inappropriate prescription and use of benzodiazepines and z-drugs: a systematic review. *PeerJ* **6**, e5535.
- [155] Becker E, Orellana Rios CL, Lahmann C, Rücker G, Bauer J, Boeker M (2018) Anxiety as a risk factor of Alzheimer's disease and vascular dementia. *Br J Psychiatry* **213**, 654–660.
- [156] Kivimäki M, Singh-Manoux A, Pentti J, Sabia S, Nyberg ST, Alfredsson L, Goldberg M, Knutsson A, Koskenvuo M, Koskinen A, Kouvonen A, Nordin M, Oksanen T, Strandberg T, Suominen SB, Theorell T, Vahtera J, Väänänen A, Virtanen M, Westerholm P, Westerlund H, Zins M, Seshadri S, Batty GD, Sipilä PN, Shipley MJ, Lindbohm JV, Ferrie JE, Jokela M, IPD-Work consortium (2019) Physical inactivity, cardiometabolic disease, and risk of dementia: an individual-participant meta-analysis. *BMJ* **365**, 11495.
- [157] Pal K, Mukadam N, Petersen I, Cooper C (2018) Mild cognitive impairment and progression to dementia in people with diabetes, prediabetes and metabolic syndrome: a systematic review and meta-analysis. *Soc Psychiatry Psychiatr Epidemiol* **53**, 1149–1160.
- [158] Meyer C, Hill S, Dow B, Synnot A, Hill K (2015) Translating falls prevention knowledge to community-dwelling older PLWD: A mixed-method systematic review. *Gerontologist* **55**, 560–574.
- [159] Stefanidis KB, Askew CD, Greaves K, Summers MJ (2018) The effect of non-stroke cardiovascular disease states on risk for cognitive decline and dementia: A systematic and meta-analytic review. *Neuropsychol Rev* **28**, 1–15.
- [160] Rose S, Niyazov DM, Rossignol DA, Goldenthal M, Kahler SG, Frye RE (2018) Clinical and molecular characteristics of mitochondrial dysfunction in autism spectrum disorder. *Mol Diagn Ther* **22**, 571–593.
- [161] Oudman E, Wijnia JW, van Dam M, Biter LU, Postma A (2018) Preventing Wernicke encephalopathy after bariatric surgery. *Obes Surg* **28**, 2060–2068.
- [162] Debette S, Markus HS (2010) The clinical importance of white matter hyperintensities on brain magnetic resonance imaging: systematic review and meta-analysis. *BMJ* **341**, c3666.

- [163] Surendranathan A, Rowe JB, O'Brien JT (2015) Neuroinflammation in Lewy body dementia. *Parkinsonism Relat Disord* **21**, 1398–1406.
- [164] *Continuing education for the prevention of mild cognitive impairment and Alzheimer's-type dementia: a systematic review and overview of systematic rev... Show all.*
- [165] Canevelli M, Bruno G, Grande G, Quarata F, Raganato R, Remiddi F, Valletta M, Zaccaria V, Vanacore N, Cesari M (2019) Race reporting and disparities in clinical trials on Alzheimer's disease: A systematic review. *Neurosci Biobehav Rev* **101**, 122–128.
- [166] Cai B, Zhang Y, Wang Z, Xu D, Jia Y, Guan Y, Liao A, Liu G, Chun C, Li J (2020) Therapeutic potential of diosgenin and its major derivatives against neurological diseases: Recent advances. *Oxid Med Cell Longev* **2020**, 3153082.
- [167] Zeng D, Jiang C, Su C, Tan Y, Wu J (2019) Anticoagulation in atrial fibrillation and cognitive decline: A systematic review and meta-analysis. *Medicine (Baltimore)* **98**, e14499.
- [168] Chai B, Gao F, Wu R, Dong T, Gu C, Lin Q, Zhang Y (2019) Vitamin D deficiency as a risk factor for dementia and Alzheimer's disease: an updated meta-analysis. *BMC Neurol* **19**, 284.
- [169] *Protocol for a systematic review of the development of depression among adolescents and young adults: Psychological, biological, and contextual perspe... Show all.*
- [170] Hussenoeder FS, Riedel-Heller SG (2018) Primary prevention of dementia: from modifiable risk factors to a public brain health agenda? *Soc Psychiatry Psychiatr Epidemiol* **53**, 1289–1301.
- [171] Valencia WM, Botros D, Vera-Nunez M, Dang S (2018) Diabetes treatment in the elderly: Incorporating geriatrics, technology, and functional medicine. *Curr Diab Rep* **18**, 95.
- [172] An R, Nickols-Richardson SM, Khan N, Liu J, Liu R, Clarke C (2019) Impact of beef and beef product intake on cognition in children and young adults: A systematic review. *Nutrients* **11**, 1797.
- [173] Loperto I, Simonetti A, Nardone A, Triassi M (2019) Use of adjuvanted trivalent influenza vaccine in older-age adults: a systematic review of economic evidence. *Hum Vaccin Immunother* **15**, 1035–1047.
- [174] Backhouse T, Camino J, Mioshi E (2018) What do we know about behavioral crises in dementia? A systematic review. *J Alzheimers Dis* **62**, 99–113.
- [175] Möllers T, Stocker H, Wei W, Perna L, Brenner H (2019) Length of hospital stay and dementia: A systematic review of observational studies. *Int J Geriatr Psychiatry* **34**, 8–21.
- [176] Moore DC, Keegan TJ, Dunleavy L, Froggatt K (2019) Factors associated with length of stay in care homes: a systematic review of international literature. *Syst Rev* **8**, 56.
- [177] Norton S, Matthews FE, Barnes DE, Yaffe K, Brayne C (2014) Potential for primary prevention of Alzheimer's disease: an analysis of population-based data. *Lancet Neurol* **13**, 788–794.
- [178] Veronese N, Zurlo A, Solmi M, Luchini C, Trevisan C, Bano G, Manzano E, Sergi G, Rylander R (2016) Magnesium status in Alzheimer's disease: A systematic review. *Am J Alzheimers Dis Other Demen* **31**, 208–213.
- [179] Bayani M, Riahi SM, Bazrafshan N, Ray Gamble H, Rostami A (2019) Toxoplasma gondii infection and risk of Parkinson and Alzheimer diseases: A systematic review and meta-analysis on observational studies. *Acta Trop* **196**, 165–171.



- [180] Frieser MJ, Wilson S, Vrieze S (2018) Behavioral impact of return of genetic test results for complex disease: Systematic review and meta-analysis. *Health Psychol* **37**, 1134–1144.
- [181] Molino S, Dossena M, Buonocore D, Ferrari F, Venturini L, Ricevuti G, Verri M (2016) Polyphenols in dementia: From molecular basis to clinical trials. *Life Sci* **161**, 69–77.
- [182] Rozas NS, Sadowsky JM, Jeter CB (2017) Strategies to improve dental health in elderly patients with cognitive impairment: A systematic review. *J Am Dent Assoc* **148**, 236-245.e3.
- [183] Falck RS, Davis JC, Liu-Ambrose T (2017) What is the association between sedentary behaviour and cognitive function? A systematic review. *Br J Sports Med* **51**, 800–811.
- [184] Derbyshire E (2018) Brain health across the lifespan: A systematic review on the role of omega-3 fatty acid supplements. *Nutrients* **10**,.
- [185] Fink HA, Jutkowitz E, McCarten JR, Hemmy LS, Butler M, Davila H, Ratner E, Calvert C, Barclay TR, Brasure M, Nelson VA, Kane RL (2018) Pharmacologic interventions to prevent cognitive decline, mild cognitive impairment, and clinical Alzheimer-type dementia: A systematic review. *Ann Intern Med* **168**, 39–51.
- [186] Martinez F, Tobar C, Hill N (2015) Preventing delirium: should non-pharmacological, multicomponent interventions be used? A systematic review and meta-analysis of the literature. *Age Ageing* **44**, 196–204.
- [187] Vagelatos NT, Eslick GD (2013) Type 2 diabetes as a risk factor for Alzheimer’s disease: the confounders, interactions, and neuropathology associated with this relationship. *Epidemiol Rev* **35**, 152–160.
- [188] Shams S, Wahlund L-O (2016) Cerebral microbleeds as a biomarker in Alzheimer’s disease? A review in the field. *Biomark Med* **10**, 9–18.
- [189] Sibbett RA, Russ TC, Deary IJ, Starr JM (2017) Dementia ascertainment using existing data in UK longitudinal and cohort studies: a systematic review of methodology. *BMC Psychiatry* **17**, 239.
- [190] Zingler G, Hermann B, Fischer T, Herdegen T (2016) Cardiovascular adverse events by non-steroidal anti-inflammatory drugs: when the benefits outweigh the risks. *Expert Rev Clin Pharmacol* **9**, 1479–1492.
- [191] Strimbu K, Tavel JA (2010) What are biomarkers? *Curr Opin HIV AIDS* **5**, 463–466.
- [192] Lee Y, Back JH, Kim J, Kim S-H, Na DL, Cheong H-K, Hong CH, Kim YG (2010) Systematic review of health behavioral risks and cognitive health in older adults. *Int Psychogeriatr* **22**, 174–187.
- [193] Sood R, Faubion SS, Kuhle CL, Thielen JM, Shuster LT (2014) Prescribing menopausal hormone therapy: an evidence-based approach. *Int J Womens Health* **6**, 47–57.
- [194] Chokesuwattanaskul A, Lertjitbanjong P, Thongprayoon C, Bathini T, Sharma K, Mao MA, Cheungpasitporn W, Chokesuwattanaskul R (2020) Impact of obstructive sleep apnea on silent cerebral small vessel disease: a systematic review and meta-analysis. *Sleep Med* **68**, 80–88.
- [195] Shen Z, Ruan Q, Yu Z, Sun Z (2017) Chronic kidney disease-related physical frailty and cognitive impairment: a systemic review. *Geriatr Gerontol Int* **17**, 529–544.
- [196] Martins YA, Tsuchida CJ, Antoniassi P, Demarchi IG (2017) Efficacy and safety of the immunization with DNA for Alzheimer’s disease in animal models: A systematic review from literature. *J Alzheimers Dis Rep* **1**, 195–217.

- [197] Low L-F, Yap MHW, Brodaty H (2010) Will testing for apolipoprotein E assist in tailoring dementia risk reduction? A review. *Neurosci Biobehav Rev* **34**, 408–437.
- [198] Valenti R, Pantoni L, Markus HS (2014) Treatment of vascular risk factors in patients with a diagnosis of Alzheimer’s disease: a systematic review. *BMC Med* **12**, 160.
- [199] *Depressive Symptoms in Mild Cognitive Impairment and the Risk of Dementia: A Systematic Review and Comparative Meta-Analysis of Clinical and Community... Show all.*
- [200] Chee JN, Rapoport MJ, Molnar F, Herrmann N, O’Neill D, Marottoli R, Mitchell S, Tant M, Dow J, Ayotte D, Lanctôt KL, McFadden R, Taylor J-P, Donaghy PC, Olsen K, Classen S, Elzohairy Y, Carr DB (2017) Update on the risk of motor vehicle collision or driving impairment with dementia: A collaborative international systematic review and meta-analysis. *Am J Geriatr Psychiatry* **25**, 1376–1390.
- [201] Joska JA, Gouse H, Paul RH, Stein DJ, Flisher AJ (2010) Does highly active antiretroviral therapy improve neurocognitive function? A systematic review. *J Neurovirol* **16**, 101–114.
- [202] Llibre Rodríguez J de J (2013) Aging and dementia: Implications for Cuba’s research community, public health and society. *MEDICC Rev* **15**, 54–59.
- [203] Parial LL, Lam SC, Ho JYS, Suen LKP, Leung AYM (2021) Public knowledge of the influence of modifiable cardiovascular risk factors on dementia: a systematic literature review and meta-analysis. *Aging Ment Health* **25**, 1395–1409.
- [204] Buswell M, Goodman C, Roe B, Russell B, Norton C, Harwood R, Fader M, Harari D, Drennan VM, Malone JR, Madden M, Bunn F (2017) What works to improve and manage fecal incontinence in care home residents living with dementia? A realist synthesis of the evidence. *J Am Med Dir Assoc* **18**, 752-760.e1.
- [205] Phelan EA, Debnam KJ, Anderson LA, Owens SB (2015) A systematic review of intervention studies to prevent hospitalizations of community-dwelling older adults with dementia. *Med Care* **53**, 207–213.
- [206] Etgen T, Sander D, Bickel H, Förstl H (2011) Mild cognitive impairment and dementia: the importance of modifiable risk factors. *Dtsch Arztebl Int* **108**, 743–750.
- [207] Eastell R, Rosen CJ, Black DM, Cheung AM, Murad MH, Shoback D (2019) Pharmacological management of osteoporosis in postmenopausal women: An endocrine society\* clinical practice guideline. *J Clin Endocrinol Metab* **104**, 1595–1622.
- [208] Zhang Y, Zhang J, Tian C, Xiao Y, Li X, He C, Huang J, Fan H (2011) The -1082G/A polymorphism in IL-10 gene is associated with risk of Alzheimer’s disease: a meta-analysis. *J Neurol Sci* **303**, 133–138.
- [209] Cannistraro RJ, Badi M, Eidelman BH, Dickson DW, Middlebrooks EH, Meschia JF (2019) CNS small vessel disease: A clinical review. *Neurology* **92**, 1146–1156.
- [210] Topiwala H, Terrera GM, Stirland L, Saunderson K, Russ TC, Dozier MF, Ritchie CW (2018) Lifestyle and neurodegeneration in midlife as expressed on functional magnetic resonance imaging: A systematic review. *Alzheimers Dement (N Y)* **4**, 182–194.
- [211] Debette S, Schilling S, Duperron M-G, Larsson SC, Markus HS (2019) Clinical significance of magnetic resonance imaging markers of vascular brain injury: A systematic review and meta-analysis. *JAMA Neurol* **76**, 81–94.
- [212] Cao L, Tan L, Wang H-F, Jiang T, Zhu X-C, Yu J-T (2017) Cerebral microinfarcts and dementia: A systematic review and metaanalysis. *Curr Alzheimer Res* **14**, 802–808.

- [213] Postoperative delirium after hip surgery is a potential risk factor for incident dementia: A systematic review and meta-analysis of prospective studie... Show all.
- [214] Rutjes AW, Denton DA, Di Nisio M, Chong L-Y, Abraham RP, Al-Assaf AS, Anderson JL, Malik MA, Vernooij RW, Martínez G, Tabet N, McCleery J (2018) Vitamin and mineral supplementation for maintaining cognitive function in cognitively healthy people in mid and late life. *Cochrane Database Syst Rev* **12**, CD011906.
- [215] Guerchet M, Aboyans V, Nubukpo P, Lacroix P, Clément J-P, Preux P-M (2011) Ankle-brachial index as a marker of cognitive impairment and dementia in general population. A systematic review. *Atherosclerosis* **216**, 251–257.
- [216] Bornstein S, Baker R, Navarro P, Mackey S, Speed D, Sullivan M (2017) Putting research in place: an innovative approach to providing contextualized evidence synthesis for decision makers. *Syst Rev* **6**, 218.
- [217] Ligthart SA, Richard E, van Gool WA, Moll van Charante EP (2012) Cardiovascular risk management in community-dwelling elderly: opportunities for prevention. *Eur J Prev Cardiol* **19**, 1365–1372.
- [218] Fu H, Xu Z, Zhang X-L, Zheng G-Q (2019) Kaixinsan, a well-known Chinese herbal prescription, for Alzheimer's disease and depression: A preclinical systematic review. *Front Neurosci* **13**, 1421.
- [219] Stanley K, Walker Z (2014) Do patients with young onset Alzheimer's disease deteriorate faster than those with late onset Alzheimer's disease? A review of the literature. *Int Psychogeriatr* **26**, 1945–1953.
- [220] Cheng H, Wang L, Shi T, Shang Y, Jiang L (2015) Association of insulin degrading enzyme gene polymorphisms with Alzheimer's disease: a meta-analysis. *Int J Neurosci* **125**, 328–335.
- [221] Witlox J, Eurelings LSM, de Jonghe JFM, Kalisvaart KJ, Eikelenboom P, van Gool WA (2010) Delirium in elderly patients and the risk of postdischarge mortality, institutionalization, and dementia: a meta-analysis. *JAMA* **304**, 443–451.
- [222] Smith L, Luchini C, Demurtas J, Soysal P, Stubbs B, Hamer M, Nottegar A, Lawlor RT, Lopez-Sanchez GF, Firth J, Koyanagi A, Roberts J, Willeit P, Waldhoer T, Loosemore M, Abbs AD, Johnstone J, Yang L, Veronese N (2019) Telomere length and health outcomes: An umbrella review of systematic reviews and meta-analyses of observational studies. *Ageing Res Rev* **51**, 1–10.
- [223] Li M, Wang W, Li Y, Wang L, Shen X, Tang Z (2013) CYP46A1 intron-2T/C polymorphism and Alzheimer's disease: an updated meta-analysis of 16 studies including 3,960 cases and 3,828 controls. *Neurosci Lett* **549**, 18–23.
- [224] Schouler-Ocak M, Kastrup MC, Vaishnav M, Javed A (2020) Mental health of migrants. *Indian J Psychiatry* **62**, 242–246.
- [225] Sadaie MR, Farhoudi M, Zamanlu M, Aghamohammadzadeh N, Amouzegar A, Rosenbaum RE, Thomas GA (2018) What does the research say about androgen use and cerebrovascular events? *Ther Adv Drug Saf* **9**, 439–455.
- [226] Kim JK, Tabassum N, Uddin MR, Park SU (2016) Ginseng: a miracle sources of herbal and pharmacological uses. *Orient Pharm Exp Med* **16**, 243–250.

- [227] Hill KD, Hunter SW, Batchelor FA, Cavalheri V, Burton E (2015) Individualized home-based exercise programs for older people to reduce falls and improve physical performance: A systematic review and meta-analysis. *Maturitas* **82**, 72–84.
- [228] Jensen JS, Reiter-Theil S, Celio DA, Jakob M, Vach W, Saxer FJ (2019) Handling of informed consent and patient inclusion in research with geriatric trauma patients - a matter of protection or disrespect? *Clin Interv Aging* **14**, 321–334.
- [229] Sánchez-Sánchez ML, García-Vigara A, Hidalgo-Mora JJ, García-Pérez M-Á, Tarín J, Cano A (2020) Mediterranean diet and health: A systematic review of epidemiological studies and intervention trials. *Maturitas* **136**, 25–37.
- [230] Cass SP (2017) Alzheimer’s disease and exercise: A literature review. *Curr Sports Med Rep* **16**, 19–22.
- [231] Yan D, Zhang Y, Liu L, Yan H (2016) Pesticide exposure and risk of Alzheimer’s disease: a systematic review and meta-analysis. *Sci Rep* **6**, 32222.
- [232] de Oliveira Silva F, Ferreira JV, Plácido J, Chagas D, Praxedes J, Guimarães C, Batista LA, Marinho V, Laks J, Deslandes AC (2019) Stages of mild cognitive impairment and Alzheimer’s disease can be differentiated by declines in timed up and go test: A systematic review and meta-analysis. *Arch Gerontol Geriatr* **85**, 103941.
- [233] Kunkle BW, Grenier-Boley B, Sims R, Bis JC, Damotte V, Naj AC, Boland A, Vronskaya M, van der Lee SJ, Amlie-Wolf A, Bellenguez C, Frizatti A, Chouraki V, Martin ER, Sleegers K, Badarinarayan N, Jakobsdottir J, Hamilton-Nelson KL, Moreno-Grau S, Oulas R, Raybould R, Chen Y, Kuzma AB, Hiltunen M, Morgan T, Ahmad S, Vardarajan BN, Epelbaum J, Hoffmann P, Boada M, Beecham GW, Garnier J-G, Harold D, Fitzpatrick AL, Valladares O, Moutet M-L, Gerrish A, Smith AV, Qu L, Bacq D, Denning N, Jian X, Zhao Y, Del Zompo M, Fox NC, Choi S-H, Mateo I, Hughes JT, Adams HH, Malamon J, Sanchez-Garcia F, Patel Y, Brody JA, Dombroski BA, Naranjo MCD, Daniilidou M, Eiriksdottir G, Mukherjee S, Wallon D, Uphill J, Aspelund T, Cantwell LB, Garzia F, Galimberti D, Hofer E, Butkiewicz M, Fin B, Scarpini E, Sarnowski C, Bush WS, Meslage S, Kornhuber J, White CC, Song Y, Barber RC, Engelborghs S, Sordon S, Voijnovic D, Adams PM, Vandenberghe R, Mayhaus M, Cupples LA, Albert MS, De Deyn PP, Gu W, Himali JJ, Beekly D, Squassina A, Hartmann AM, Orellana A, Blacker D, Rodriguez-Rodriguez E, Lovestone S, Garcia ME, Doody RS, Munoz-Fernandez C, Sussams R, Lin H, Fairchild TJ, Benito YA, Holmes C, Karamujic-Comić H, Frosch MP, Thonberg H, Maier W, Roshchupkin G, Ghetti B, Giedraitis V, Kawalia A, Li S, Huebinger RM, Kilander L, Moebus S, Hernández I, Kamboh MI, Brundin R, Turton J, Yang Q, Katz MJ, Concaro L, Lord J, Beiser AS, Keene CD, Helisalmi S, Kloszewska I, Kukull WA, Koivisto AM, Lynch A, Tarraga L, Larson EB, Haapasalo A, Lawlor B, Mosley TH, Lipton RB, Solfrizzi V, Gill M, Longstreth WT Jr, Montine TJ, Frisardi V, Diez-Fairen M, Rivadeneira F, Petersen RC, Deramecourt V, Alvarez I, Salani F, Ciarabella A, Boerwinkle E, Reiman EM, Fievet N, Rotter JI, Reisch JS, Hanon O, Cupidi C, Uitterlinden AGA, Royall DR, Dufouil C, Maletta RG, de Rojas I, Sano M, Brice A, Cecchetti R, George-Hyslop PS, Ritchie K, Tsolaki M, Tsuang DW, Dubois B, Craig D, Wu C-K, Soininen H, Avramidou D, Albin RL, Fratiglioni L, Germanou A, Apostolova LG, Keller L, Koutroumani M, Arnold SE, Panza F, Gkatzima O, Asthana S, Hannequin D, Whitehead P, Atwood CS, Caffarra P, Hampel H, Quintela I, Carracedo Á,

Lannfelt L, Rubinsztein DC, Barnes LL, Pasquier F, Frölich L, Barral S, McGuinness B, Beach TG, Johnston JA, Becker JT, Passmore P, Bigio EH, Schott JM, Bird TD, Warren JD, Boeve BF, Lupton MK, Bowen JD, Proitsi P, Boxer A, Powell JF, Burke JR, Kauwe JSK, Burns JM, Mancuso M, Buxbaum JD, Bonuccelli U, Cairns NJ, McQuillin A, Cao C, Livingston G, Carlson CS, Bass NJ, Carlsson CM, Hardy J, Carney RM, Bras J, Carrasquillo MM, Guerreiro R, Allen M, Chui HC, Fisher E, Masullo C, Crocco EA, DeCarli C, Bisceglia G, Dick M, Ma L, Duara R, Graff-Radford NR, Evans DA, Hodges A, Faber KM, Scherer M, Fallon KB, Riemenschneider M, Fardo DW, Heun R, Farlow MR, Kölsch H, Ferris S, Leber M, Foroud TM, Heuser I, Galasko DR, Giegling I, Gearing M, Hüll M, Geschwind DH, Gilbert JR, Morris J, Green RC, Mayo K, Growdon JH, Feulner T, Hamilton RL, Harrell LE, Driche D, Honig LS, Cushion TD, Huentelman MJ, Hollingworth P, Hulette CM, Hyman BT, Marshall R, Jarvik GP, Meggy A, Abner E, Menzies GE, Jin L-W, Leonenko G, Real LM, Jun GR, Baldwin CT, Grozeva D, Karydas A, Russo G, Kaye JA, Kim R, Jessen F, Kowall NW, Vellas B, Kramer JH, Vardy E, LaFerla FM, Jöckel K-H, Lah JJ, Dichgans M, Leverenz JB, Mann D, Levey AI, Pickering-Brown S, Lieberman AP, Klopp N, Lunetta KL, Wichmann H-E, Lyketsos CG, Morgan K, Marson DC, Brown K, Martiniuk F, Medway C, Mash DC, Nöthen MM, Masliah E, Hooper NM, McCormick WC, Daniele A, McCurry SM, Bayer A, McDavid AN, Gallacher J, McKee AC, van den Bussche H, Mesulam M, Brayne C, Miller BL, Riedel-Heller S, Miller CA, Miller JW, Al-Chalabi A, Morris JC, Shaw CE, Myers AJ, Wiltfang J, O'Bryant S, Olichney JM, Alvarez V, Parisi JE, Singleton AB, Paulson HL, Collinge J, Perry WR, Mead S, Peskind E, Cribbs DH, Rossor M, Pierce A, Ryan NS, Poon WW, Nacmias B, Potter H, Sorbi S, Quinn JF, Sacchinelli E, Raj A, Spalletta G, Raskind M, Caltagirone C, Bossù P, Orfei MD, Reisberg B, Clarke R, Reitz C, Smith AD, Ringman JM, Warden D, Roberson ED, Wilcock G, Rogava E, Bruni AC, Rosen HJ, Gallo M, Rosenberg RN, Ben-Shlomo Y, Sager MA, Mecocci P, Saykin AJ, Pastor P, Cuccaro ML, Vance JM, Schneider JA, Schneider LS, Slifer S, Seeley WW, Smith AG, Sonnen JA, Spina S, Stern RA, Swerdlow RH, Tang M, Tanzi RE, Trojanowski JQ, Troncoso JC, Van Deerlin VM, Van Eldik LJ, Vinters HV, Vonsattel JP, Weintraub S, Welsh-Bohmer KA, Wilhelmsen KC, Williamson J, Wingo TS, Woltjer RL, Wright CB, Yu C-E, Yu L, Saba Y, Alzheimer Disease Genetics Consortium (ADGC), European Alzheimer's Disease Initiative (EADI), Cohorts for Heart and Aging Research in Genomic Epidemiology Consortium (CHARGE), Genetic and Environmental Risk in AD/Defining Genetic, Polygenic and Environmental Risk for Alzheimer's Disease Consortium (GERAD/PERADES), Pilotto A, Bullido MJ, Peters O, Crane PK, Bennett D, Bosco P, Coto E, Boccardi V, De Jager PL, Lleo A, Warner N, Lopez OL, Ingelsson M, Deloukas P, Cruchaga C, Graff C, Gwilliam R, Fornage M, Goate AM, Sanchez-Juan P, Kehoe PG, Amin N, Ertekin-Taner N, Berr C, DeBette S, Love S, Launer LJ, Younkin SG, Dartigues J-F, Corcoran C, Ikram MA, Dickson DW, Nicolas G, Champion D, Tschanz J, Schmidt H, Hakonarson H, Clarimon J, Munger R, Schmidt R, Farrer LA, Van Broeckhoven C, O'Donovan MC, DeStefano AL, Jones L, Haines JL, Deleuze J-F, Owen MJ, Gudnason V, Mayeux R, Escott-Price V, Psaty BM, Ramirez A, Wang L-S, Ruiz A, van Duijn CM, Holmans PA, Seshadri S, Williams J, Amouyel P, Schellenberg GD, Lambert J-C, Pericak-Vance MA (2019) Author Correction: Genetic meta-analysis of diagnosed

- Alzheimer's disease identifies new risk loci and implicates A $\beta$ , tau, immunity and lipid processing. *Nat Genet* **51**, 1423–1424.
- [234] Cicala G, Barbieri MA, Spina E, de Leon J (2019) A comprehensive review of swallowing difficulties and dysphagia associated with antipsychotics in adults. *Expert Rev Clin Pharmacol* **12**, 219–234.
- [235] Strand LI, Gundrosen KF, Lein RK, Laekeman M, Lobbezoo F, Defrin R, Husebo BS (2019) Body movements as pain indicators in older people with cognitive impairment: A systematic review. *Eur J Pain* **23**, 669–685.
- [236] Laberge S, Crizzle AM (2019) A literature review of psychotropic medications and alcohol as risk factors for falls in community dwelling older adults. *Clin Drug Investig* **39**, 117–139.
- [237] Goerdten J, Čukić I, Danso SO, Carrière I, Muniz-Terrera G (2019) Statistical methods for dementia risk prediction and recommendations for future work: A systematic review. *Alzheimers Dement (N Y)* **5**, 563–569.
- [238] Dasgupta M, Hillier LM (2010) Factors associated with prolonged delirium: a systematic review. *Int Psychogeriatr* **22**, 373–394.
- [239] Xia C, Vonder M, Sidorenkov G, Oudkerk M, de Groot JC, van der Harst P, de Bock GH, De Deyn PP, Vliegenthart R (2020) The relationship of coronary artery calcium and clinical coronary artery disease with cognitive function: A systematic review and meta-analysis. *J Atheroscler Thromb* **27**, 934–958.
- [240] Hughes TM, Rosano C, Evans RW, Kuller LH (2013) Brain cholesterol metabolism, oxysterols, and dementia. *J Alzheimers Dis* **33**, 891–911.
- [241] Papathanasiou ND, Boutsiadis A, Dickson J, Bomanji JB (2012) Diagnostic accuracy of <sup>123</sup>I-FP-CIT (DaTSCAN) in dementia with Lewy bodies: a meta-analysis of published studies. *Parkinsonism Relat Disord* **18**, 225–229.
- [242] Orgeta V, Leung P (2015) Personality and dementia caring: a review and commentary. *Curr Opin Psychiatry* **28**, 57–65.
- [243] Wang H-X, Xu W, Pei J-J (2012) Leisure activities, cognition and dementia. *Biochim Biophys Acta* **1822**, 482–491.
- [244] Widmayer S, Borgwardt S, Lang UE, Huber CG (2019) Could animal-assisted therapy help to reduce coercive treatment in psychiatry? *Front Psychiatry* **10**, 794.
- [245] Wong RMY, Chong KC, Law SW, Ho WT, Li J, Chui CS, Chow SKH, Cheung WH (2020) The effectiveness of exercises on fall and fracture prevention amongst community elderlies: A systematic review and meta-analysis. *J Orthop Translat* **24**, 58–65.
- [246] Dyer SM, Laver K, Friel M, Whitehead C, Crotty M (2017) The diagnostic accuracy of the Kimberley Indigenous Cognitive Assessment (KICA) tool: a systematic review. *Australas Psychiatry* **25**, 282–287.
- [247] Baiano C, Barone P, Trojano L, Santangelo G (2020) Prevalence and clinical aspects of mild cognitive impairment in Parkinson's disease: A meta-analysis. *Mov Disord* **35**, 45–54.
- [248] Aarsland D, Sardahaee FS, Anderssen S, Ballard C, Alzheimer's Society Systematic Review group (2010) Is physical activity a potential preventive factor for vascular dementia? A systematic review. *Aging Ment Health* **14**, 386–395.

- [249] Musa MK, Saga S, Blekken LE, Harris R, Goodman C, Norton C (2019) The prevalence, incidence, and correlates of fecal incontinence among older people residing in care homes: A systematic review. *J Am Med Dir Assoc* **20**, 956-962.e8.
- [250] Serafini G, Calcagno P, Lester D, Girardi P, Amore M, Pompili M (2016) Suicide risk in Alzheimer's disease: A systematic review. *Curr Alzheimer Res* **13**, 1083-1099.
- [251] *Hormone Therapy for the Primary Prevention of Chronic Conditions in Postmenopausal Women: Evidence Report and Systematic Review for the US Preventive ... Show all.*
- [252] Lang L, Clifford A, Wei L, Zhang D, Leung D, Augustine G, Danat IM, Zhou W, Copeland JR, Anstey KJ, Chen R (2017) Prevalence and determinants of undetected dementia in the community: a systematic literature review and a meta-analysis. *BMJ Open* **7**, e011146.
- [253] Sommer I, Griebler U, Kien C, Auer S, Klerings I, Hammer R, Holzer P, Gartlehner G (2017) Vitamin D deficiency as a risk factor for dementia: a systematic review and meta-analysis. *BMC Geriatr* **17**, 16.
- [254] O'Brien H, Mohan H, Hare CO, Reynolds JV, Kenny RA (2017) Mind over matter? The hidden epidemic of cognitive dysfunction in the older surgical patient. *Ann Surg* **265**, 677-691.
- [255] Hua Y, Guo X, Huang Q, Kong Y, Lu X (2013) Association between interleukin-6 -174G/C polymorphism and the risk of Alzheimer's disease: a meta-analysis. *Int J Neurosci* **123**, 626-635.
- [256] Saini RK, Rengasamy KRR, Mahomoodally FM, Keum Y-S (2020) Protective effects of lycopene in cancer, cardiovascular, and neurodegenerative diseases: An update on epidemiological and mechanistic perspectives. *Pharmacol Res* **155**, 104730.
- [257] Angehrn Z, Sostar J, Nordon C, Turner A, Gove D, Karcher H, Keenan A, Mittelstadt B, de Reydet-de Vulpillieres F (2020) Ethical and social implications of using predictive modeling for Alzheimer's disease prevention: A systematic literature review. *J Alzheimers Dis* **76**, 923-940.
- [258] Colucci L, Bosco M, Rosario Ziello A, Rea R, Amenta F, Fasanaro AM (2012) Effectiveness of nootropic drugs with cholinergic activity in treatment of cognitive deficit: a review. *J Exp Pharmacol* **4**, 163-172.
- [259] Montgomery W, Ueda K, Jorgensen M, Stathis S, Cheng Y, Nakamura T (2018) Epidemiology, associated burden, and current clinical practice for the diagnosis and management of Alzheimer's disease in Japan. *Clinicoecon Outcomes Res* **10**, 13-28.
- [260] Xu W, Tan L, Wang H-F, Jiang T, Tan M-S, Tan L, Zhao Q-F, Li J-Q, Wang J, Yu J-T (2015) Meta-analysis of modifiable risk factors for Alzheimer's disease. *J Neurol Neurosurg Psychiatry* **86**, 1299-1306.
- [261] Peters R, Ee N, Peters J, Beckett N, Booth A, Rockwood K, Anstey KJ (2019) Common risk factors for major noncommunicable disease, a systematic overview of reviews and commentary: the implied potential for targeted risk reduction. *Ther Adv Chronic Dis* **10**, 2040622319880392.
- [262] Waters DD (2010) Exploring new indications for statins beyond atherosclerosis: Successes and setbacks. *J Cardiol* **55**, 155-162.

- [263] Russ TC, Starr JM, Stamatakis E, Kivimäki M, Batty GD (2015) Pulmonary function as a risk factor for dementia death: an individual participant meta-analysis of six UK general population cohort studies. *J Epidemiol Community Health* **69**, 550–556.
- [264] Tobore TO (2019) On the central role of mitochondria dysfunction and oxidative stress in Alzheimer's disease. *Neurol Sci* **40**, 1527–1540.
- [265] Cipriani G, Danti S, Vedovello M, Nuti A, Lucetti C (2014) Understanding delusion in dementia: a review. *Geriatr Gerontol Int* **14**, 32–39.
- [266] Guio D, François M, Duering F, Fazekas F-ED, Leeuw SM, Greenberg L, Pantoni A, Aghetti EE, Smith J, Wardlaw E (2020) Brain Atrophy in Cerebral Small Vessel Diseases: Extent, Consequences, Technical Limitations and Perspectives: The HARNESS Initiative. *Journal of Cerebral Blood Flow and Metabolism: Official Journal of the International Society of Cerebral Blood Flow and Metabolism* **40**, 231–245.
- [267] McDonald C, Newton JL, Burn DJ (2016) Orthostatic hypotension and cognitive impairment in Parkinson's disease: Causation or association? *Mov Disord* **31**, 937–946.
- [268] Lemche E (2018) Early Life Stress and epigenetics in Late-onset Alzheimer's dementia: A systematic review. *Curr Genomics* **19**, 522–602.
- [269] Arvătescu C, Moga MA, Mironescu A, Æamota I, Dracea L (2015) Hormone replacement therapy (hrt) in menopause. estetrol and brain. **50**, 418–421.
- [270] Hersi M, Irvine B, Gupta P, Gomes J, Birkett N, Krewski D (2017) Risk factors associated with the onset and progression of Alzheimer's disease: A systematic review of the evidence. *Neurotoxicology* **61**, 143–187.
- [271] Gunnarsson L-G, Bodin L (2019) Occupational exposures and neurodegenerative diseases-A systematic literature review and meta-analyses. *Int J Environ Res Public Health* **16**, 337.
- [272] National Institute on Aging, NIA Alzheimer's Disease Genetics Portfolio, Last updated 2023, Accessed on 2023.
- [273] National Institute on Aging, NIA data LINKAGE Program (LINKAGE), Last updated 2023, Accessed on 2023.
- [274] Chuang Y-N, Wang G, Chang C-Y, Lai K-H, Zha D, Tang R, Yang F, Reyes AC, Zhou K, Jiang X, Hu X (2023) DiscoverPath: A knowledge refinement and retrieval system for interdisciplinarity on biomedical research. In *Proceedings of the 32nd ACM International Conference on Information and Knowledge Management* ACM, New York, NY, USA.
- [275] Ureña-Guerrero ME, Castañeda-Cabral JL, Rivera-Cervantes MC, Macias-Velez RJ, Jarero-Basulto JJ, Gudiño-Cabrera G, Beas-Zárate C (2020) Neuroprotective and neurorestorative effects of Epo and VEGF: Perspectives for new therapeutic approaches to neurological diseases. *Curr Pharm Des* **26**, 1263–1276.



**Funding:** This study was in part supported by National Institute of Health grants R01AG080991, R56AG069880, R01AG083039, RF1AG084178, R01 AG084236, RF1AG077820, and R01AG080991.

**Disclosures/Conflict of Interests:** The authors declare that the research was conducted in the absence of any commercial or financial relationships that could be construed as potential conflicts of interest.

**Keywords:** Alzheimer’s Disease and Related Dementia, risk factors, real-world data; Natural Language Processing
